# Supplementary material for: Marine Inspired 2-(5-Halo-1H-indol-3-yl)-N,N-dimethylethanamines as Modulators of Serotonin Receptors: An Example Illustrating the Power of Bromine as Part of the Uniquely Marine Chemical Space
Source: PubMed Central journal article supplement (PMC5577603; doi:10.3390/md15080248), 2017-08-09
Supplement: marinedrugs-15-00248-s001.pdf [file marinedrugs-15-00248-s001.pdf]

## **Marine Inspired 2-(5-Halo-1*H*-indol-3-yl)-*N,N*-Dimethylethanamines As Modulators of Serotonin Receptors: An Example Illustrating the Power of Bromine as part of the Uniquely Marine Chemical Space.**

**Mohamed A. Ibrahim**<sup>1,2,3</sup>, **Abir T. El-Alfy**<sup>4,5</sup>, **Kelly Ezel**<sup>5</sup>, **Mohamed O. Radwan**<sup>3,6</sup>, **Abbas G. Shilabin**<sup>1,7</sup>, **Anna J. Kochanowska-Karamyan**<sup>1,8</sup>, **Howaida I. Abd-Alla**<sup>3</sup>, **Masami Otsuka**<sup>6</sup> and **Mark T. Hamann**<sup>1,2,5,9,\*</sup>

<sup>1</sup>Department of Pharmacognosy, the University of Mississippi, University, MS 38677, USA; [mmibrahi@olemiss.edu](mailto:mmibrahi@olemiss.edu) (M.A.I.); [SHILABIN@mail.etsu.edu](mailto:SHILABIN@mail.etsu.edu) (A.G.S.); [anna.karamyan@ttuhsc.edu](mailto:anna.karamyan@ttuhsc.edu) (A.J.K-K.); [hamannm@musc.edu](mailto:hamannm@musc.edu) (M.T.H.)

<sup>2</sup>National Center for Natural Products Research, the University of Mississippi, University, MS 38677, USA

<sup>3</sup>Department of Chemistry of Natural Compounds, National Research Center, Dokki 12622, Cairo, Egypt; [mohamedosman251@gmail.com](mailto:mohamedosman251@gmail.com) (M.O.R.); [howaida\\_nrc@yahoo.com](mailto:howaida_nrc@yahoo.com) (H.I.A-A.)

<sup>4</sup>Biopharmaceutical Sciences Department, Medical College of Wisconsin Pharmacy School, Milwaukee, WI 53226, USA; [aelalfy@mcw.edu](mailto:aelalfy@mcw.edu)

<sup>5</sup>Department of Pharmacology, The University of Mississippi, University, MS, 38677, USA; [dionysus21@yahoo.com](mailto:dionysus21@yahoo.com)

<sup>6</sup> Department of Bioorganic Medicinal Chemistry, Faculty of Life Sciences, Kumamoto University, Chuo-ku, Kumamoto 862-0973, Japan; [motsuka@gpo.kumamoto-u.ac.jp](mailto:motsuka@gpo.kumamoto-u.ac.jp)

<sup>7</sup>Department of Chemistry, East Tennessee State University, Johnson City, TN 37614, USA

<sup>8</sup>Department of Pharmaceutical Sciences, School of Pharmacy, Texas Tech University HSC, Amarillo, TX 79106, USA

<sup>9</sup>Department of Drug Discovery and Biomedical Sciences, Medical University of South Carolina, Charleston, SC 29425, USA

\*Correspondence: [hamannm@musc.edu](mailto:hamannm@musc.edu); Tel.: +1 843-876-2316; Fax: +1 843-876-2353  
3-876-2353

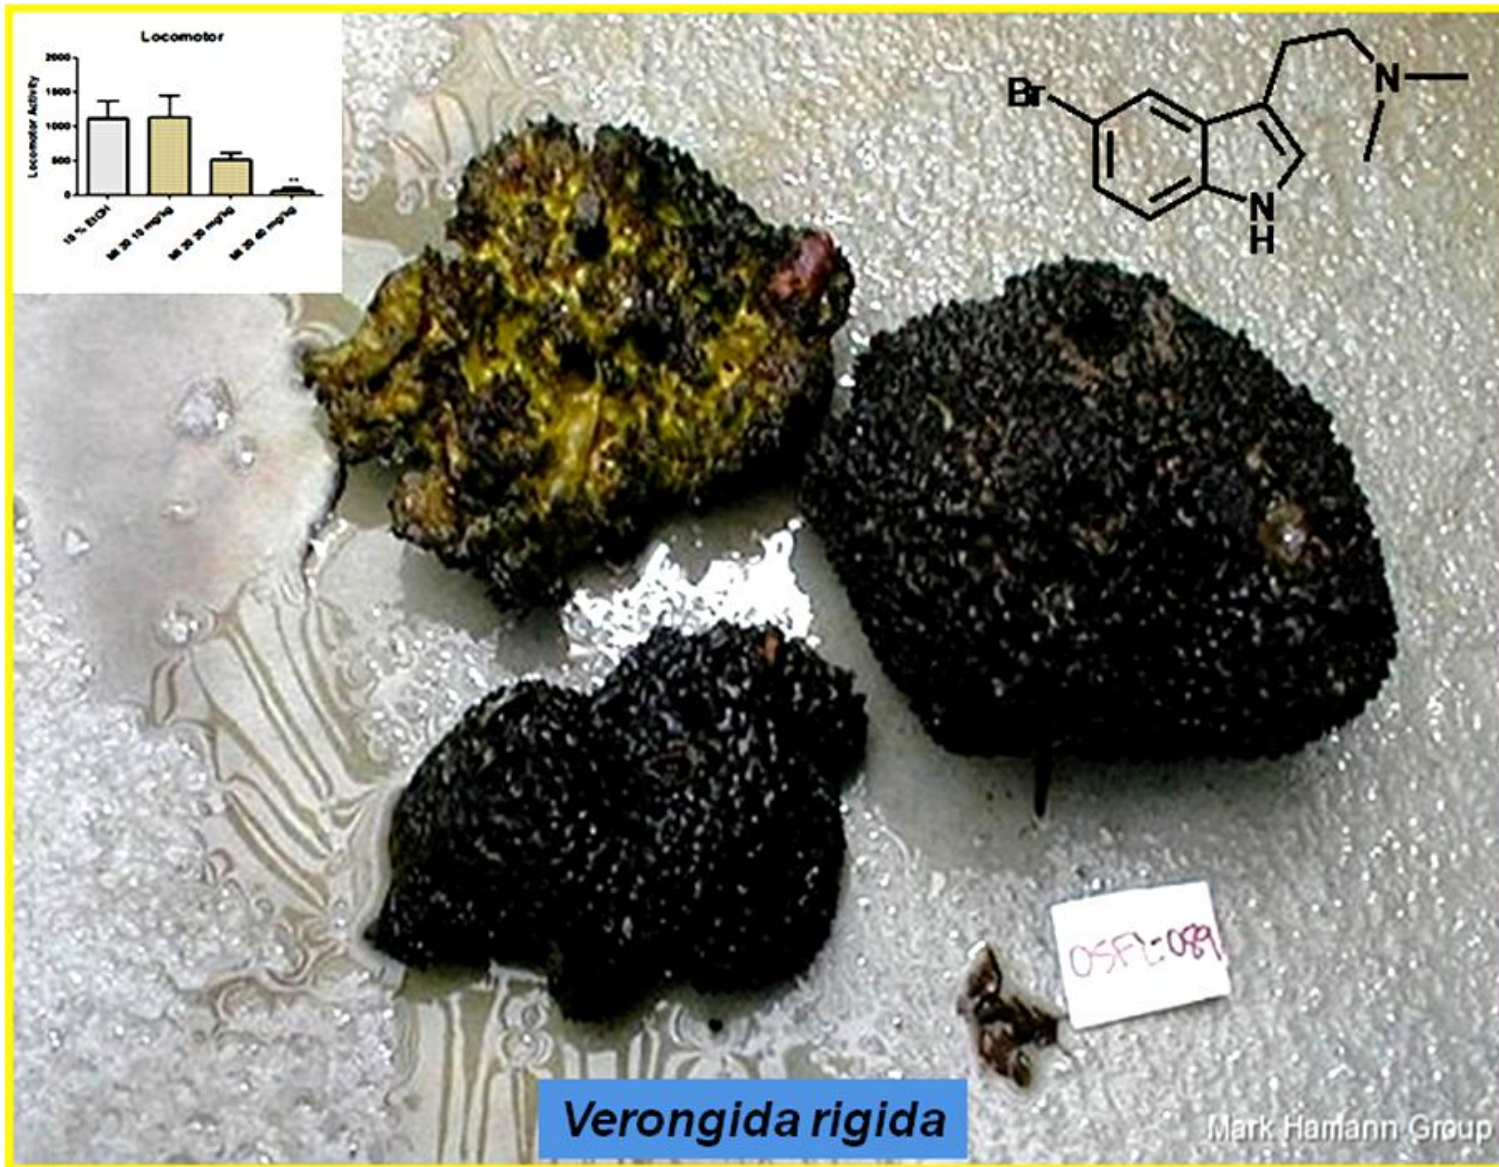

Figure 1. Picture of the sponge *Verongida rigida*

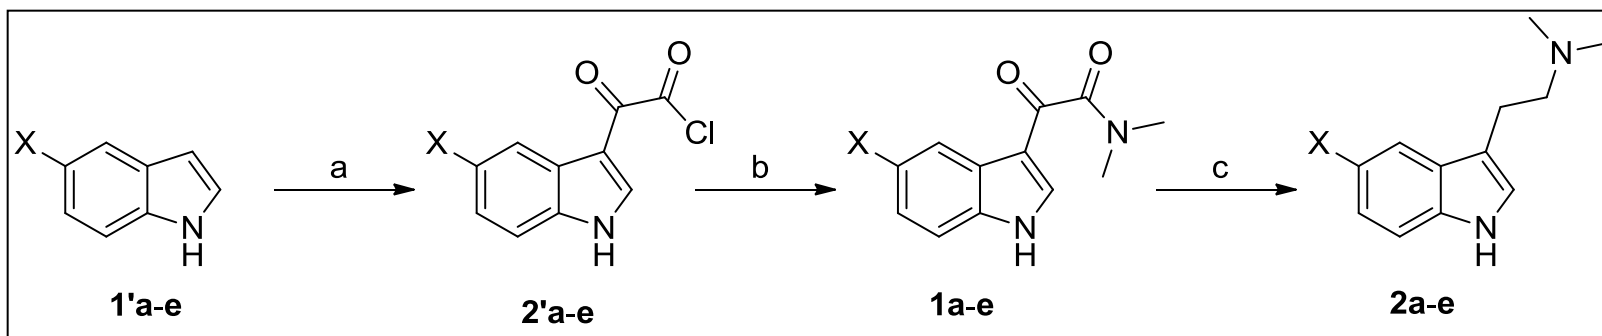

**Figure 2.** The synthesis of 5-haloindoledimethylethanamines. Reagents and reaction conditions: (a) Oxalyl chloride, diethyl ether, 0 °C, 30-60 min, (80-90%); (b) Dimethylamine, 0 °C, 30 min, then rt, 2 h, (80-90%); (c)  $\text{LiAlH}_4$ , DME, 0 °C, 1 h, then rt, 2 h, then 80 °C, 2 h, (65-75%)

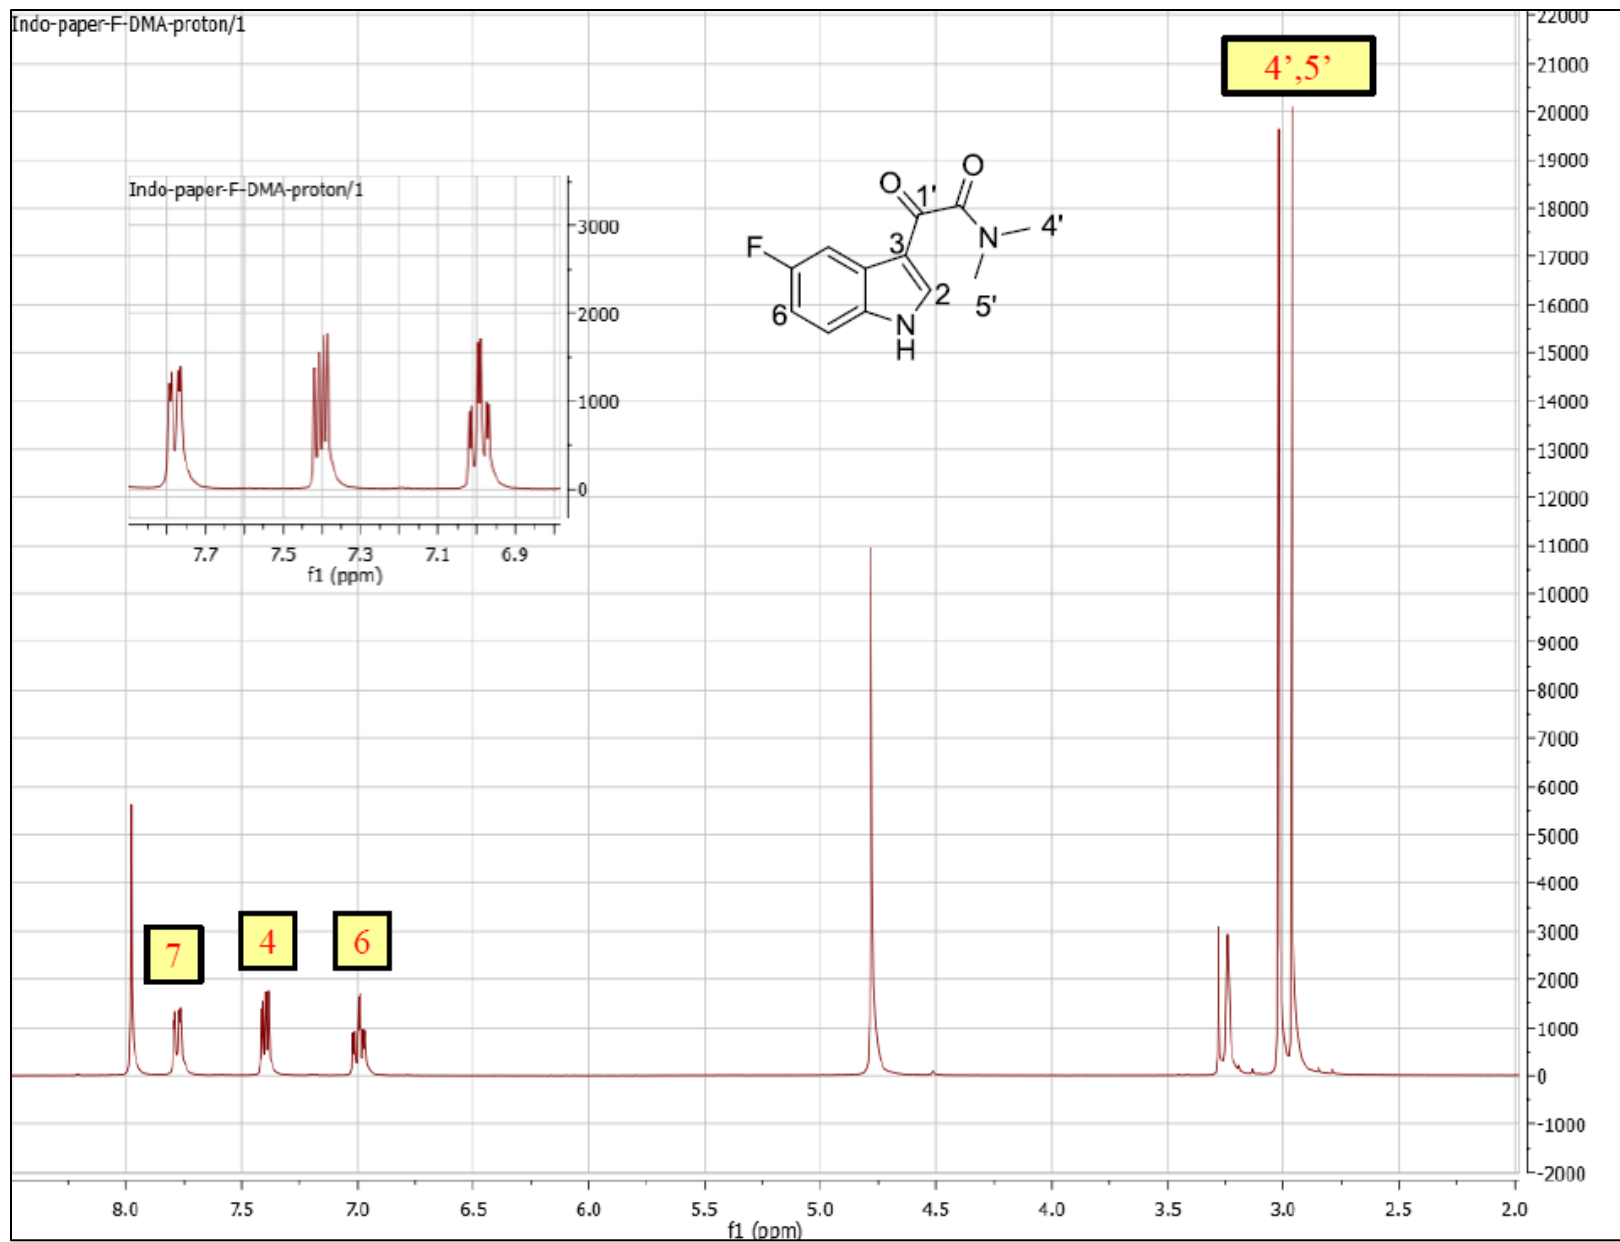

**Figure 3.**  $^1\text{H}$  NMR spectrum of 2-(5-fluoro-1*H*-indol-3-yl)-*N,N*-dimethyl-2-oxoacetamide (**1b**) in methanol- $d_4$  (400 MHz)

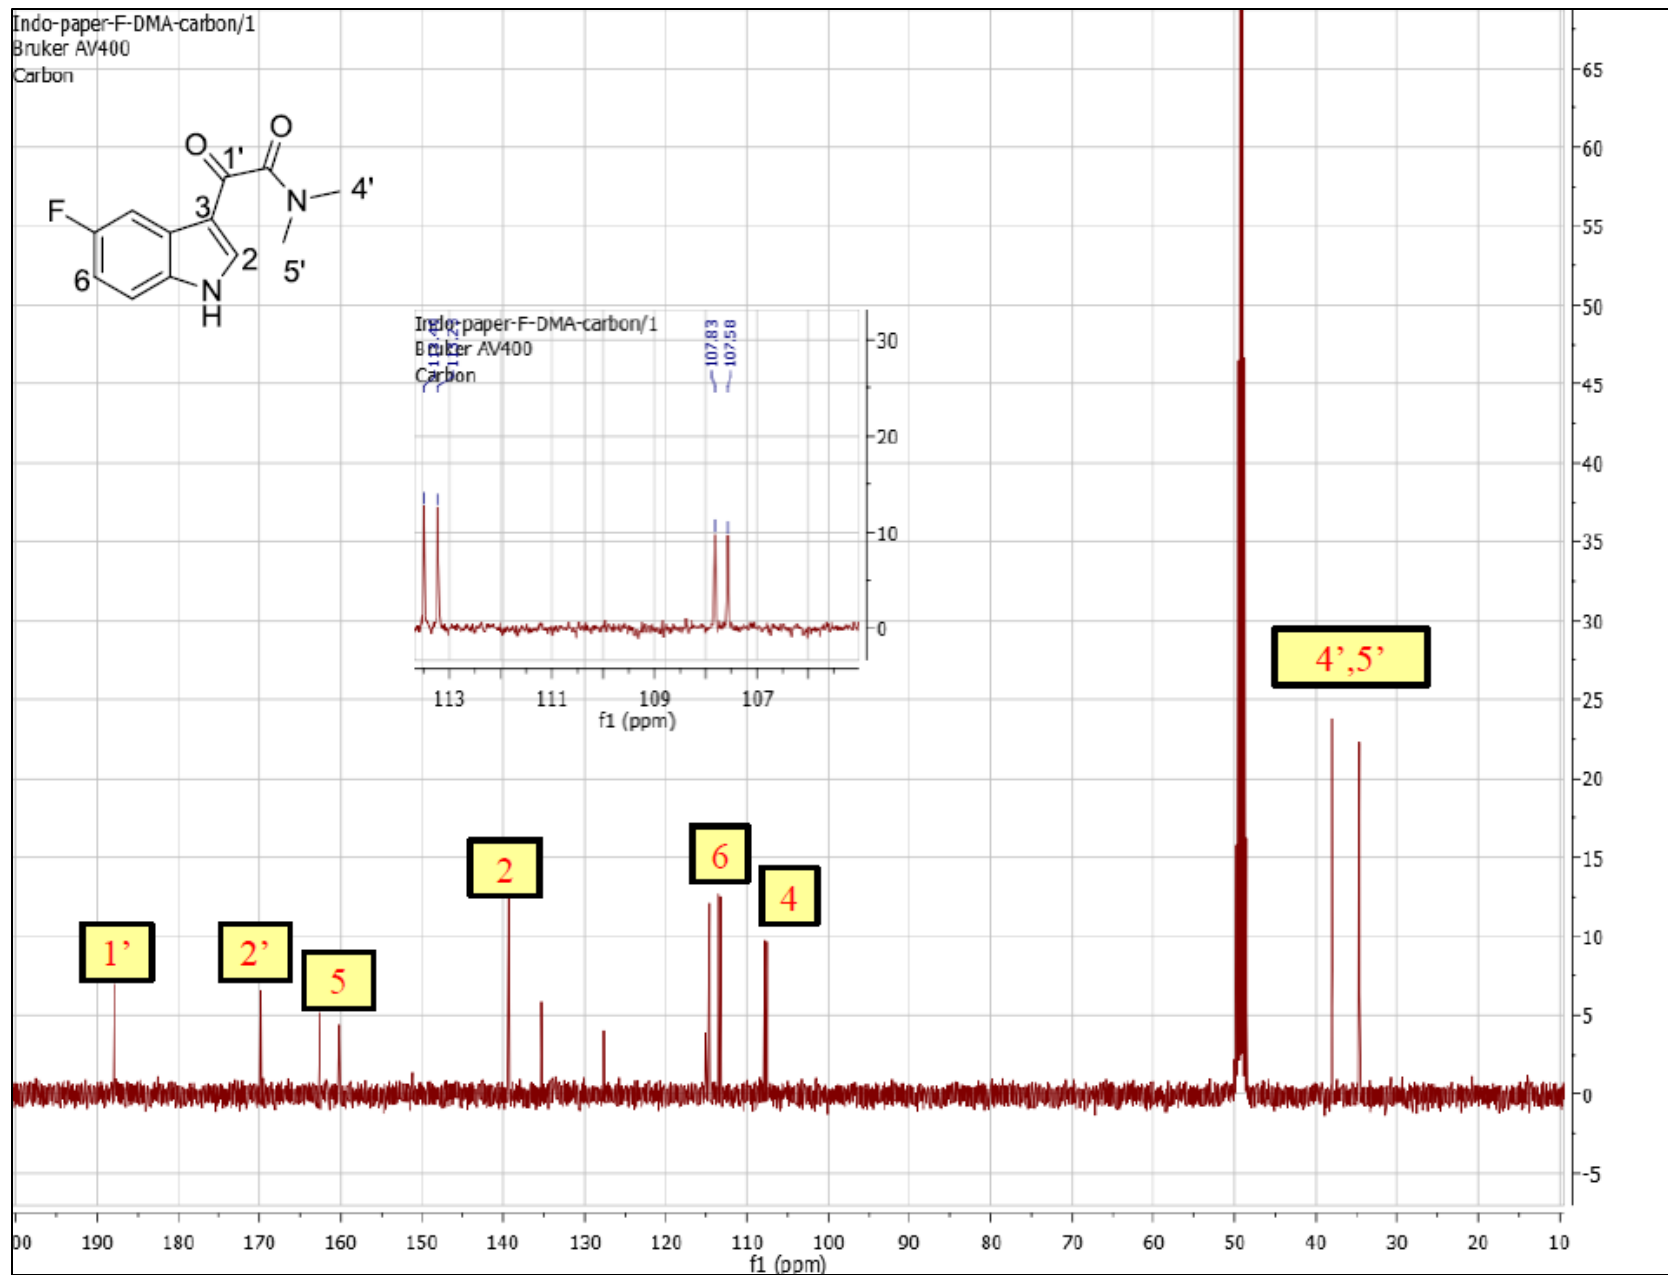

**Figure 4.**  $^{13}\text{C}$  NMR spectrum of 2-(5-fluoro-1H-indol-3-yl)-N,N-dimethyl-2-oxoacetamide (**1b**) in methanol- $d_4$  (400 MHz)

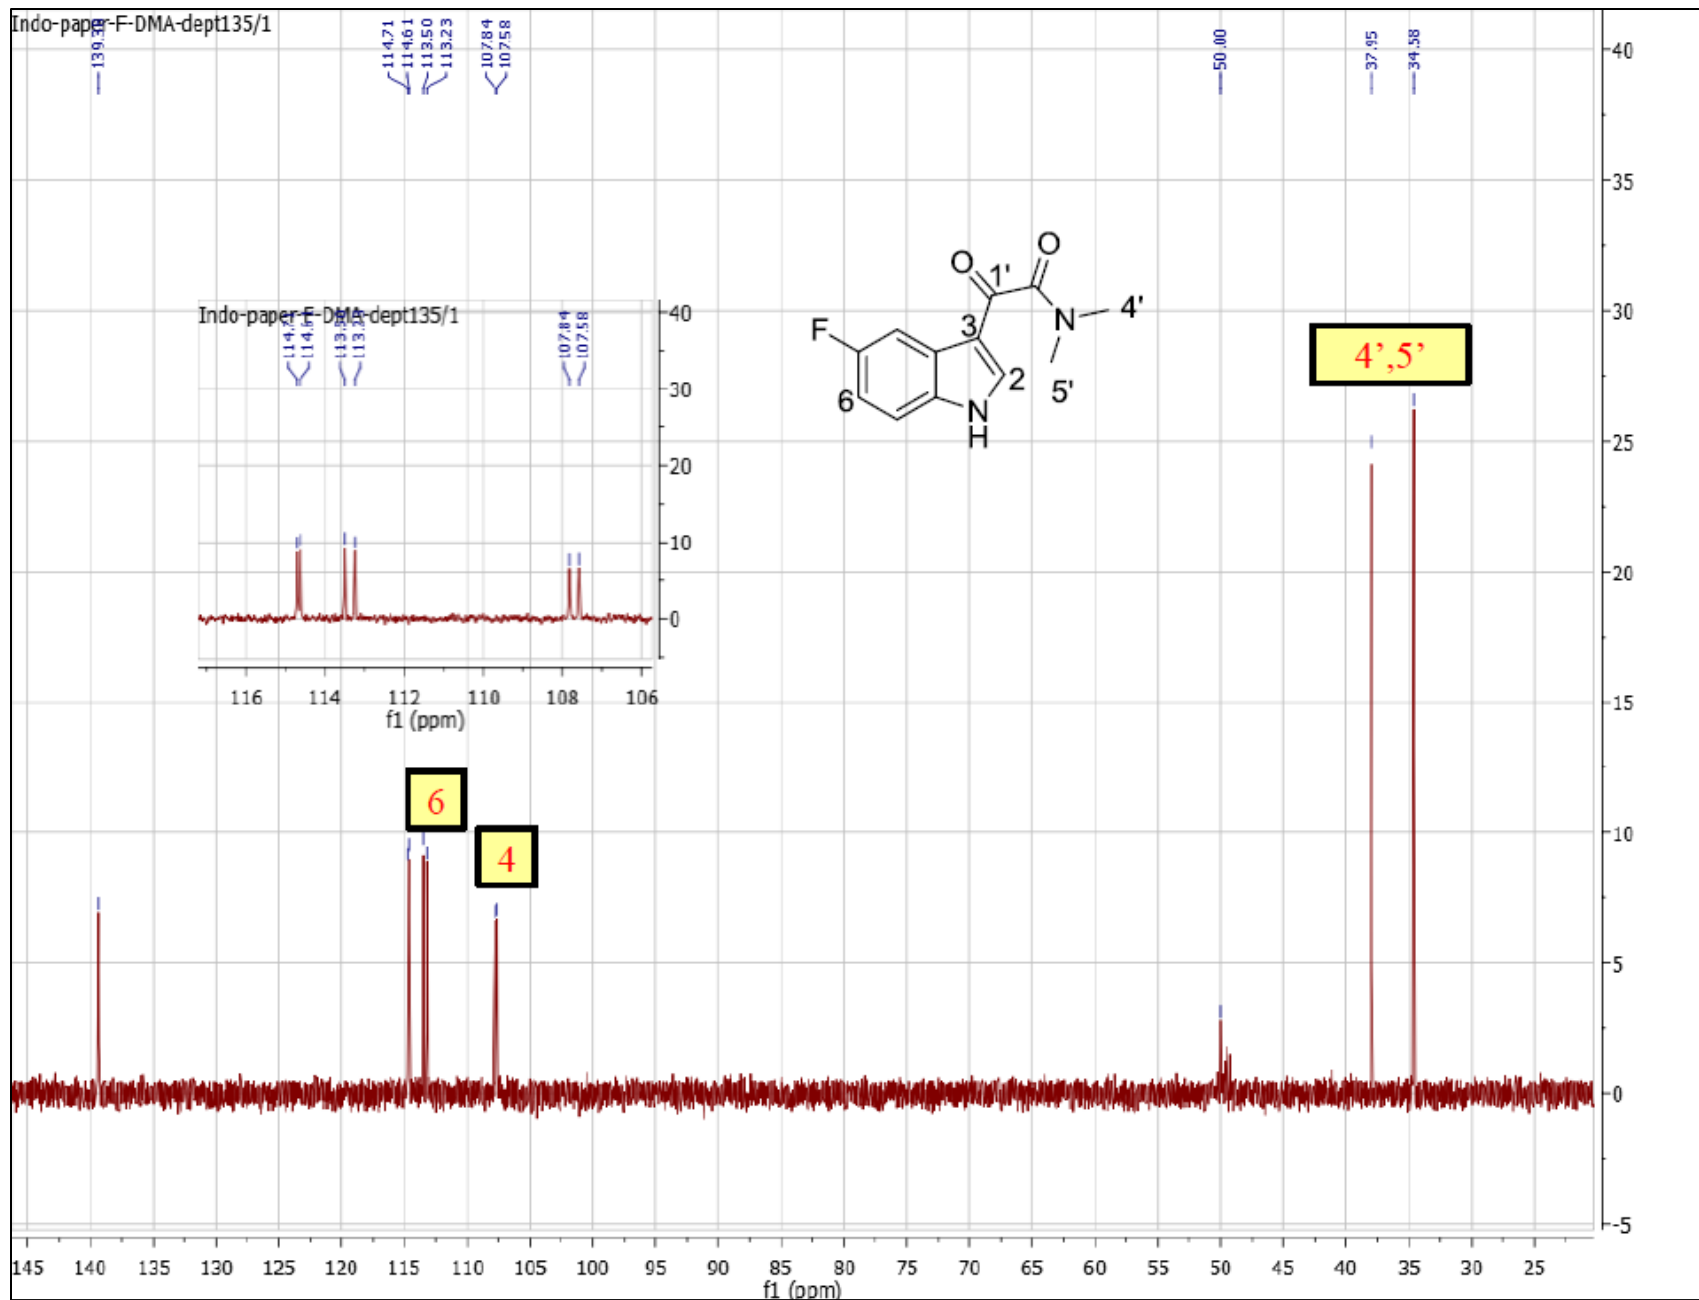

**Figure 5.**  $^{135}\text{O}$  DEPT spectrum of 2-(5-fluoro-1H-indol-3-yl)-N,N-dimethyl-2-oxoacetamide (**1b**) in methanol- $d_4$  (400 MHz)

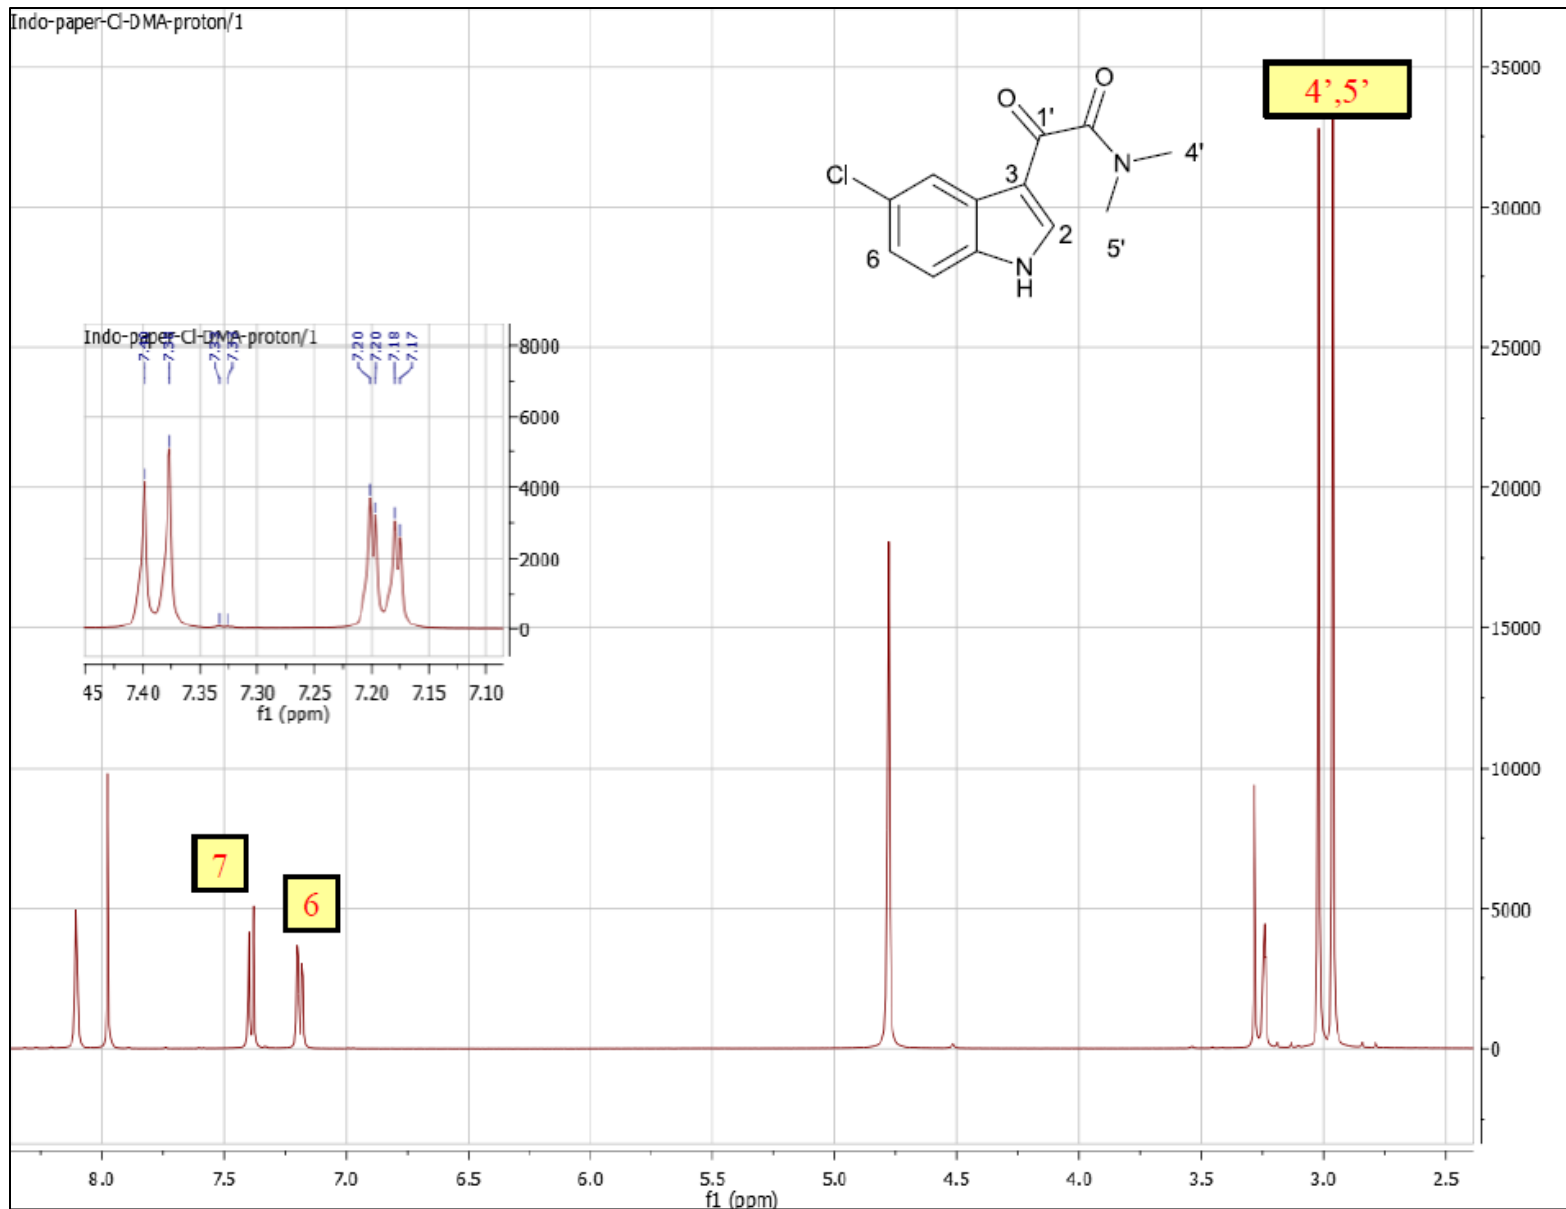

**Figure 6.**  $^1\text{H}$  NMR spectrum of 2-(5-chloro-1H-indol-3-yl)-N,N-dimethyl-2-oxoacetamide (**1c**) in methanol- $d_4$  (400 MHz)

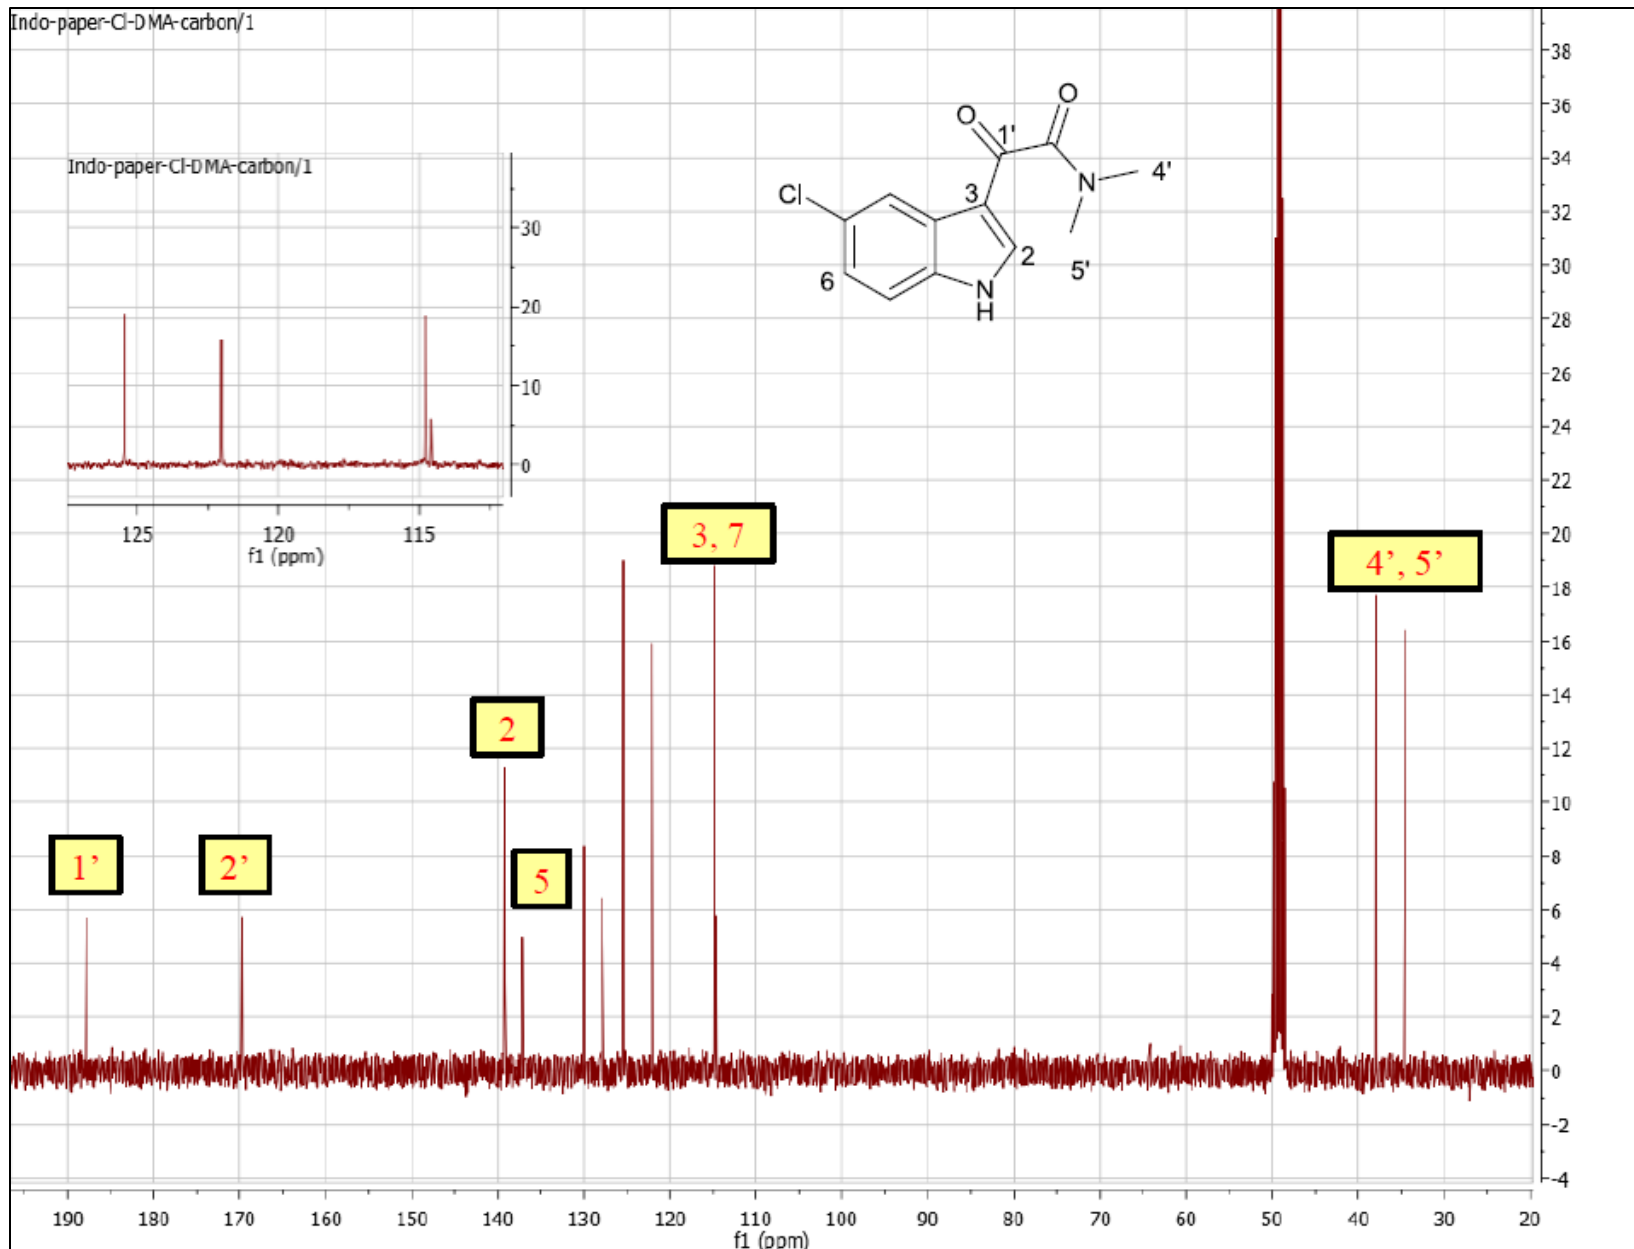

**Figure 7.**  $^{13}\text{C}$  NMR spectrum of 2-(5-chloro-1H-indol-3-yl)-N,N-dimethyl-2-oxoacetamide (**1c**) in methanol- $d_4$  (400 MHz)



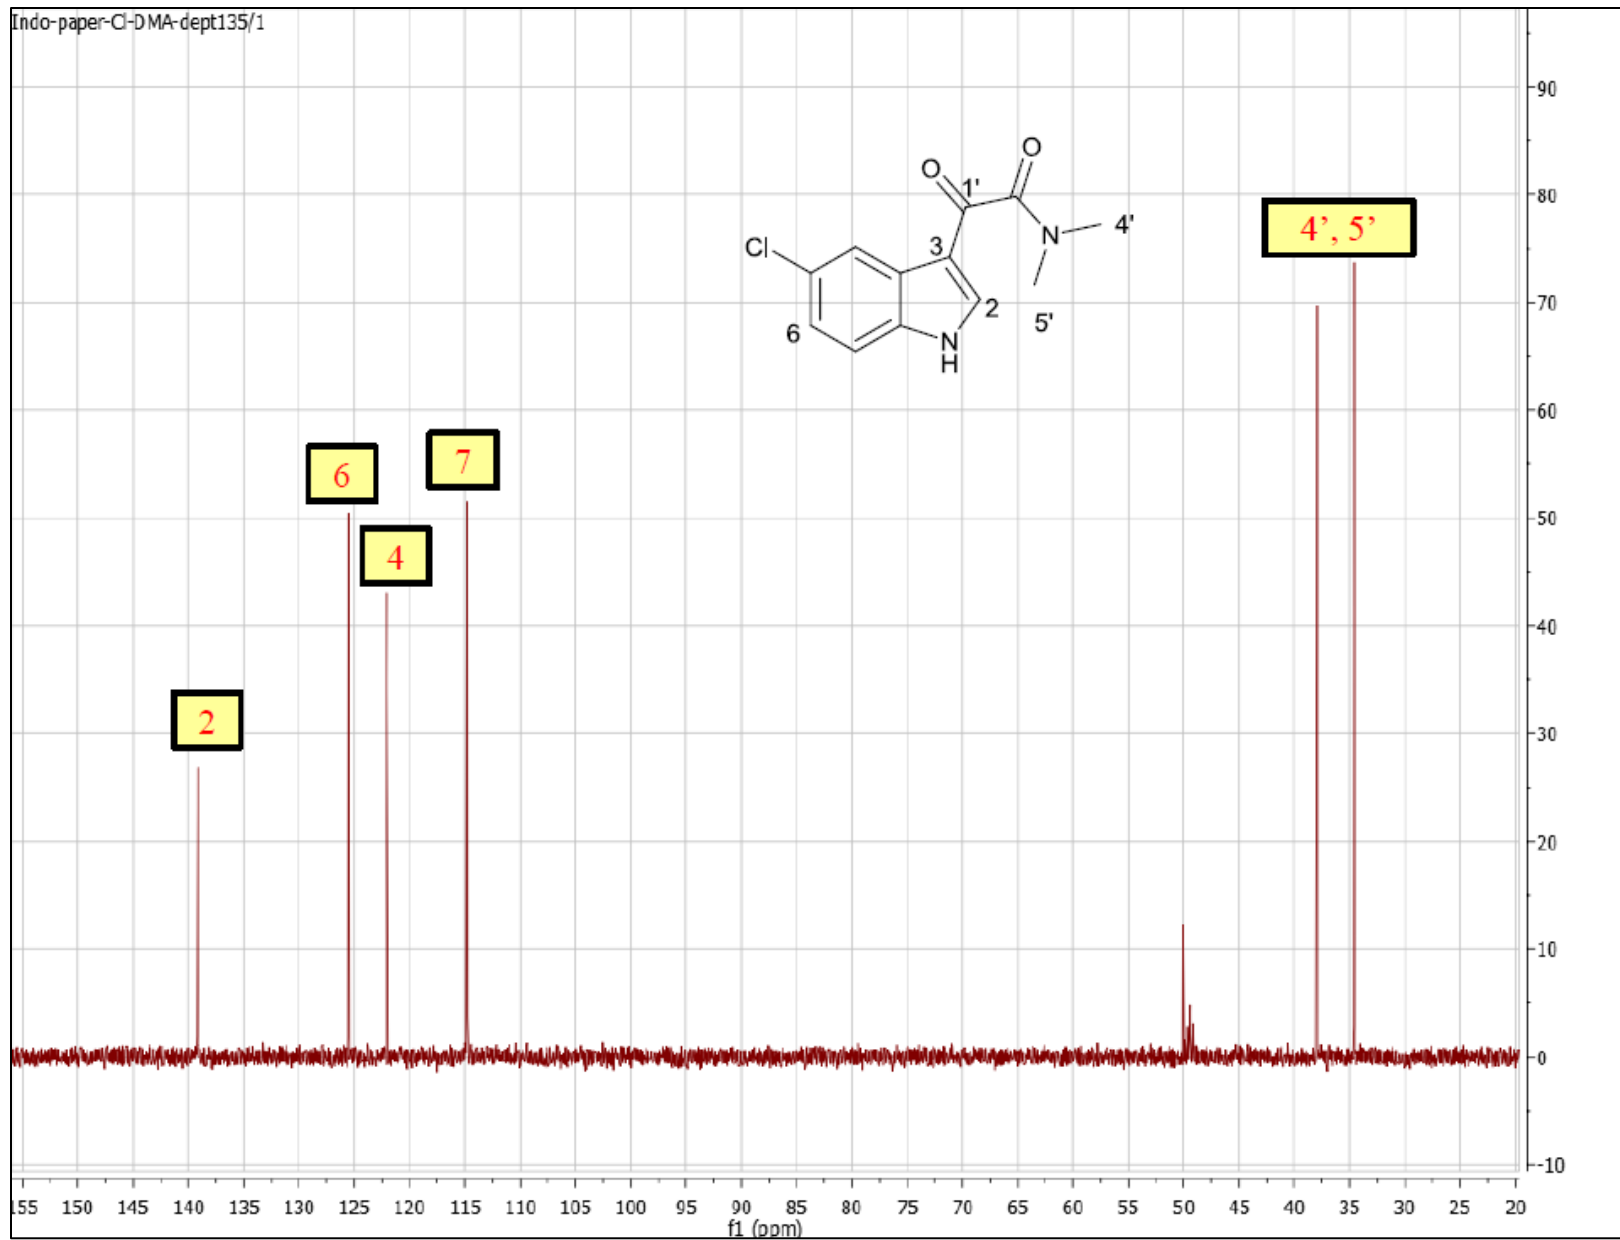

**Figure 8.**  $^{135}\text{C}$  DEPT spectrum of 2-(5-chloro-1H-indol-3-yl)-N,N-dimethyl-2-oxoacetamide (**1c**) in methanol- $d_4$  (400 MHz)

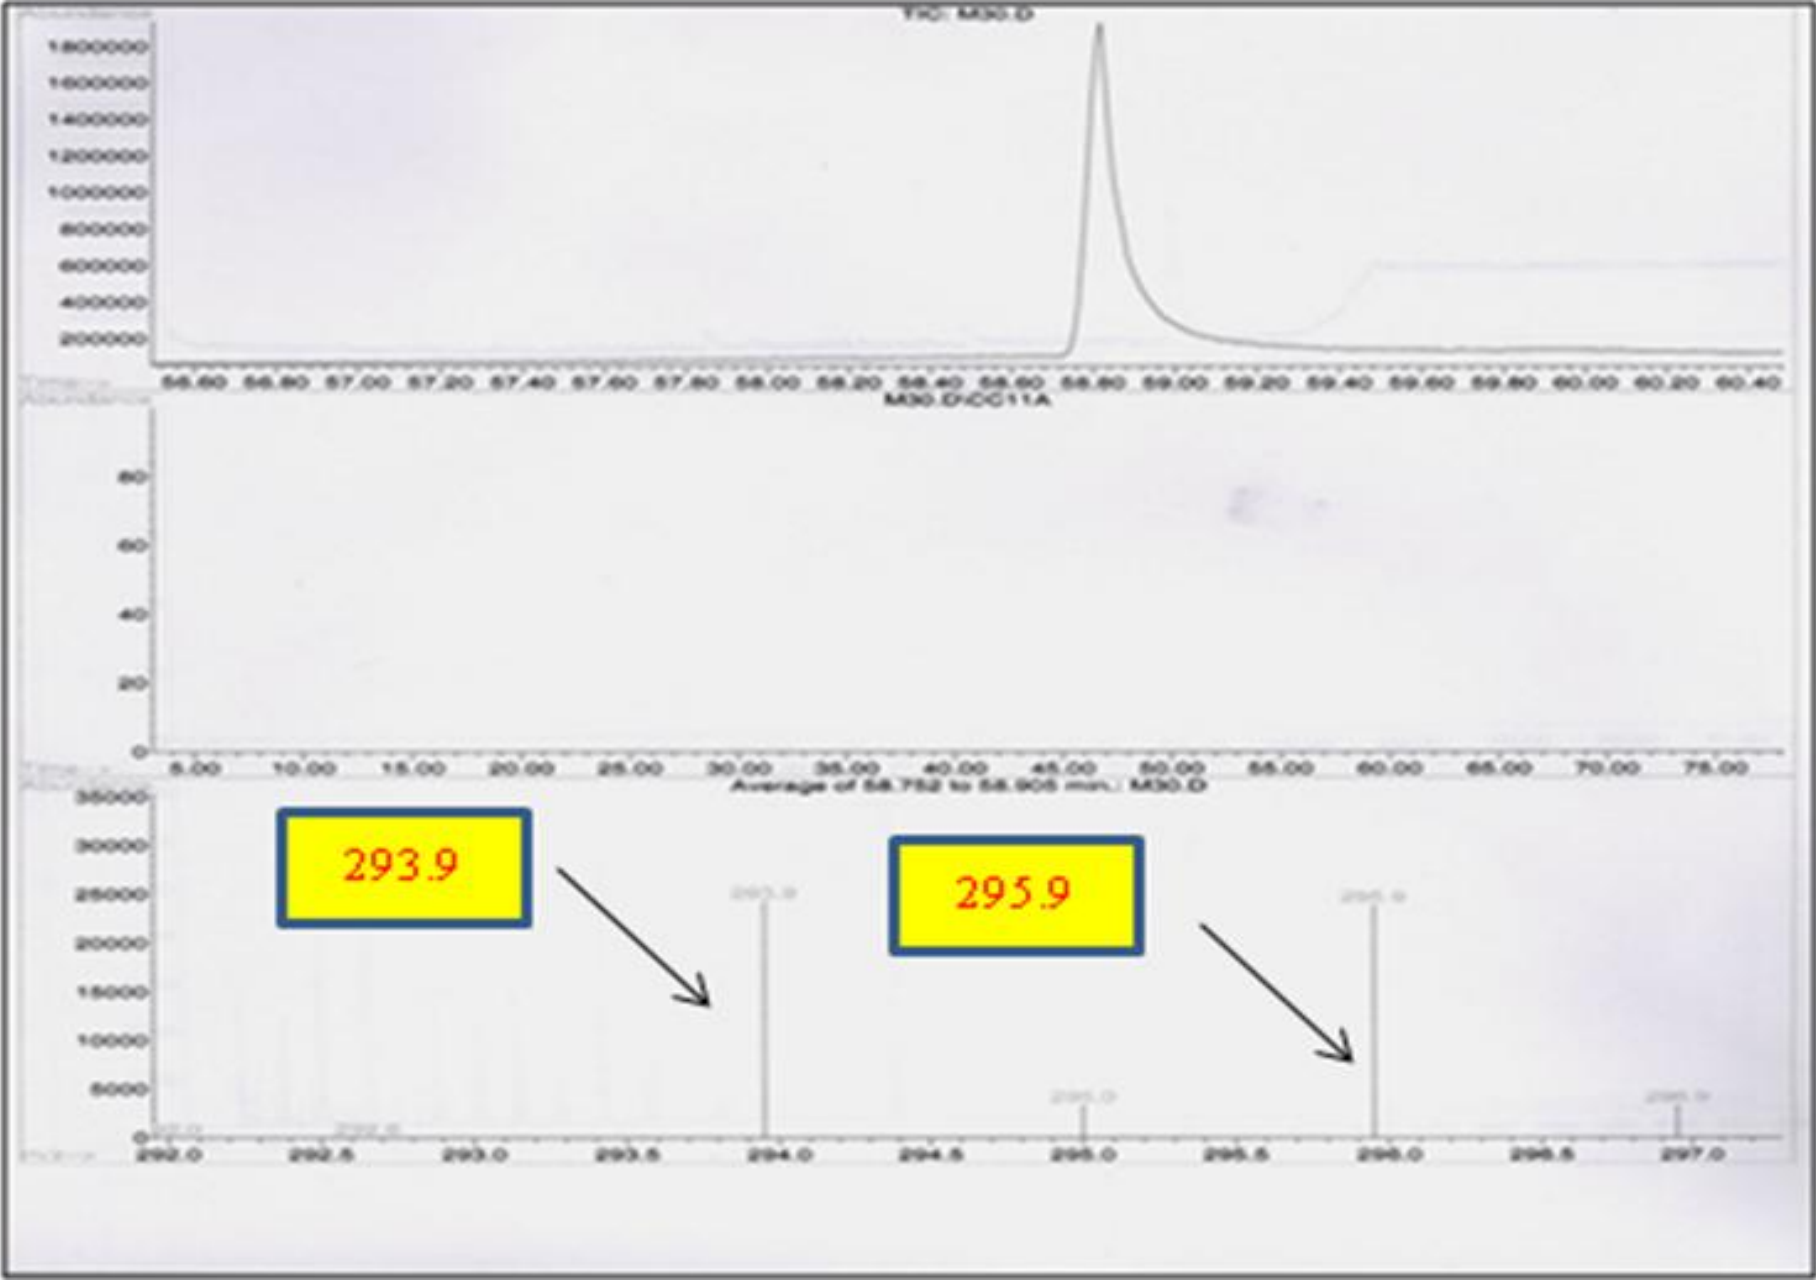

Figure 9. GC/MS chromatogram of 2-(5-bromo-1H-indol-3-yl)-N,N-dimethyl-2-oxoacetamide (1d)

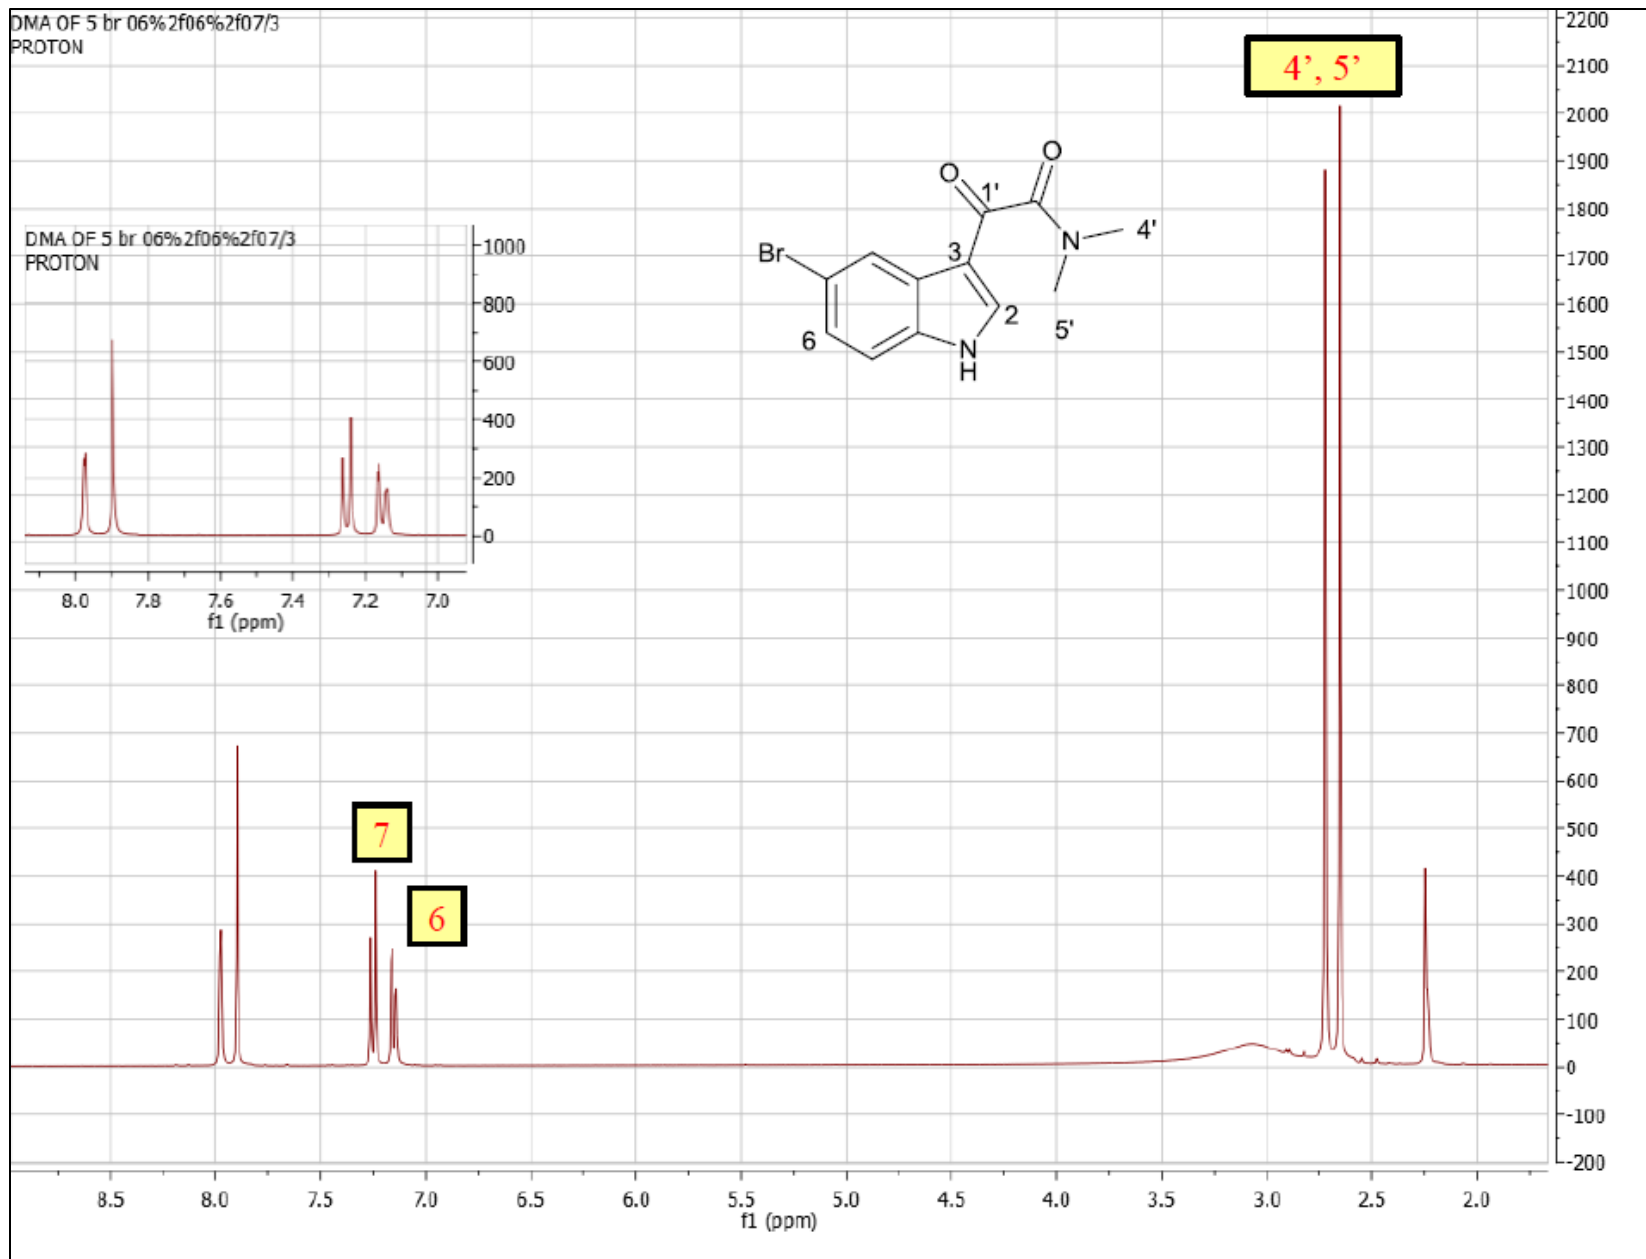

**Figure 10.**  $^1\text{H}$  NMR spectrum of 2-(5-bromo-1*H*-indol-3-yl)-*N,N*-dimethyl-2-oxoacetamide (**1d**) in  $\text{CDCl}_3$  (400 MHz)

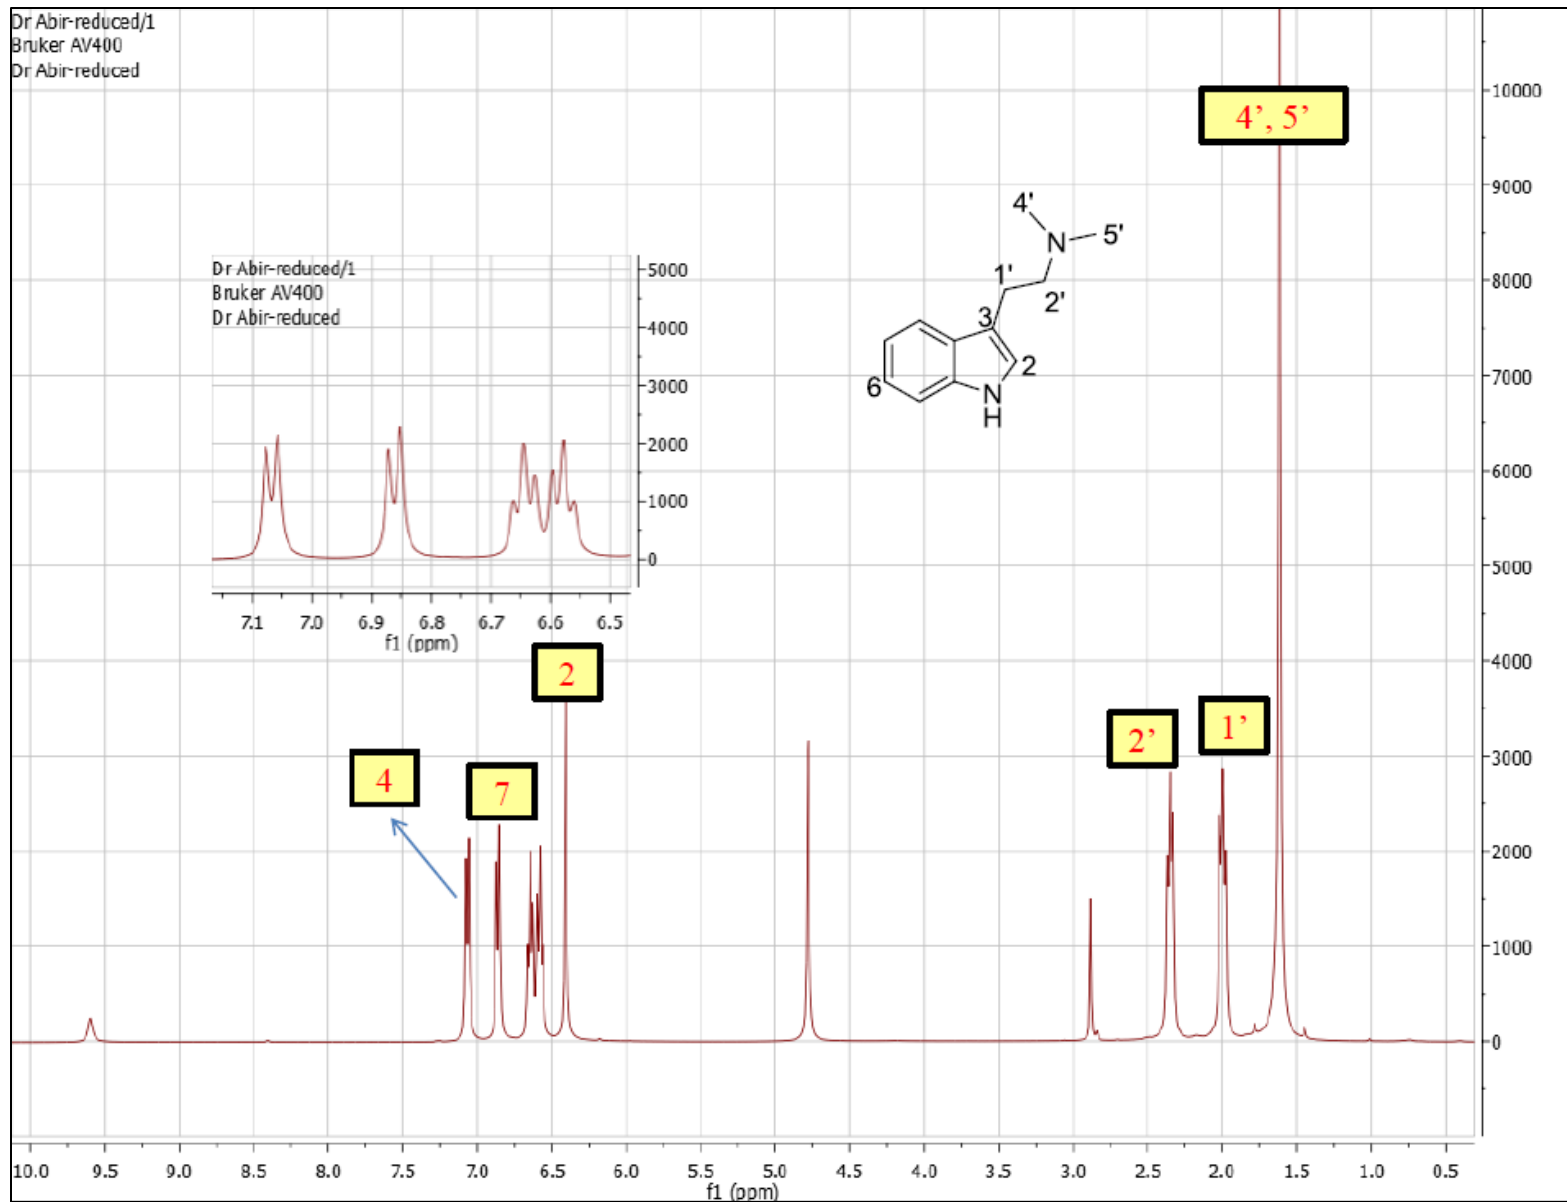

**Figure 11.**  $^1\text{H}$  NMR spectrum of 2-(1*H*-indol-3-yl)-*N,N*-dimethylethanamine (**2a**) in methanol- $d_4$  (400 MHz)

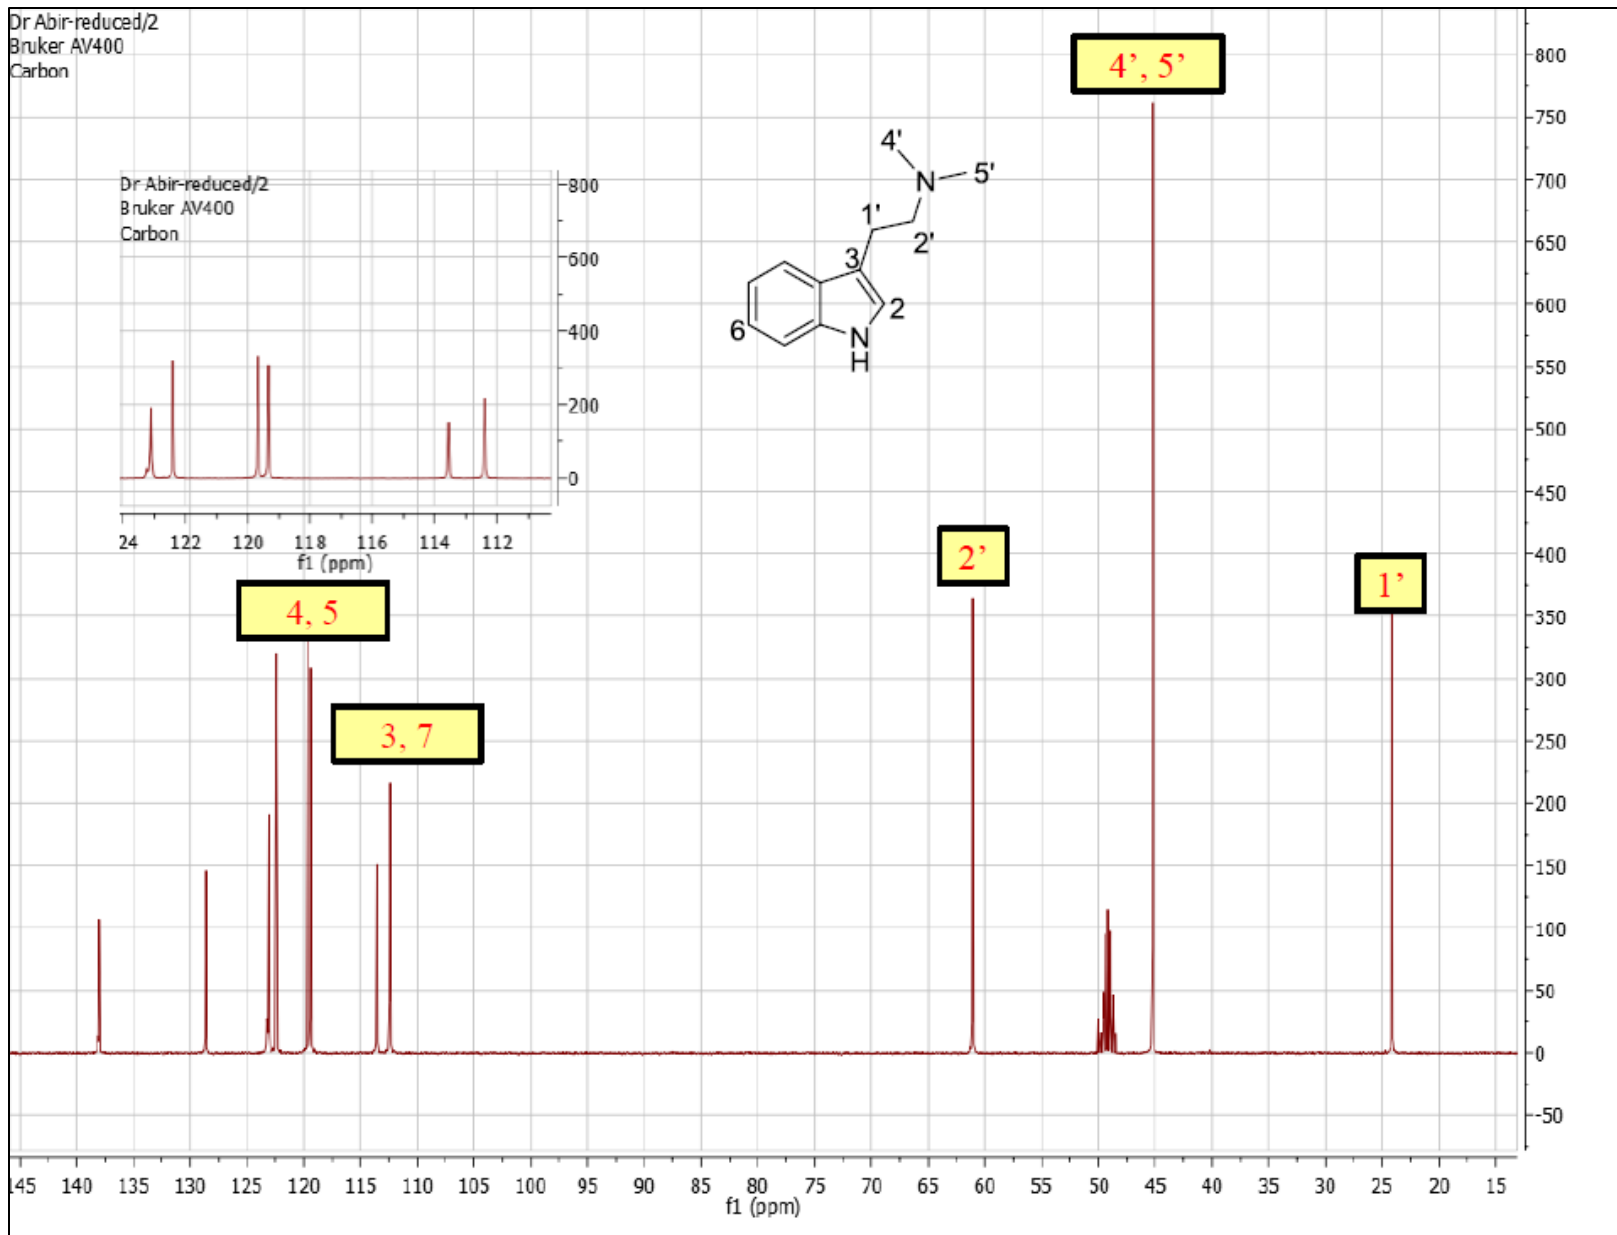

**Figure 12.**  $^{13}\text{C}$  NMR spectrum of 2-(1H-indol-3-yl)-N,N-dimethylethanamine (**2a**) in methanol- $d_4$  (400 MHz)

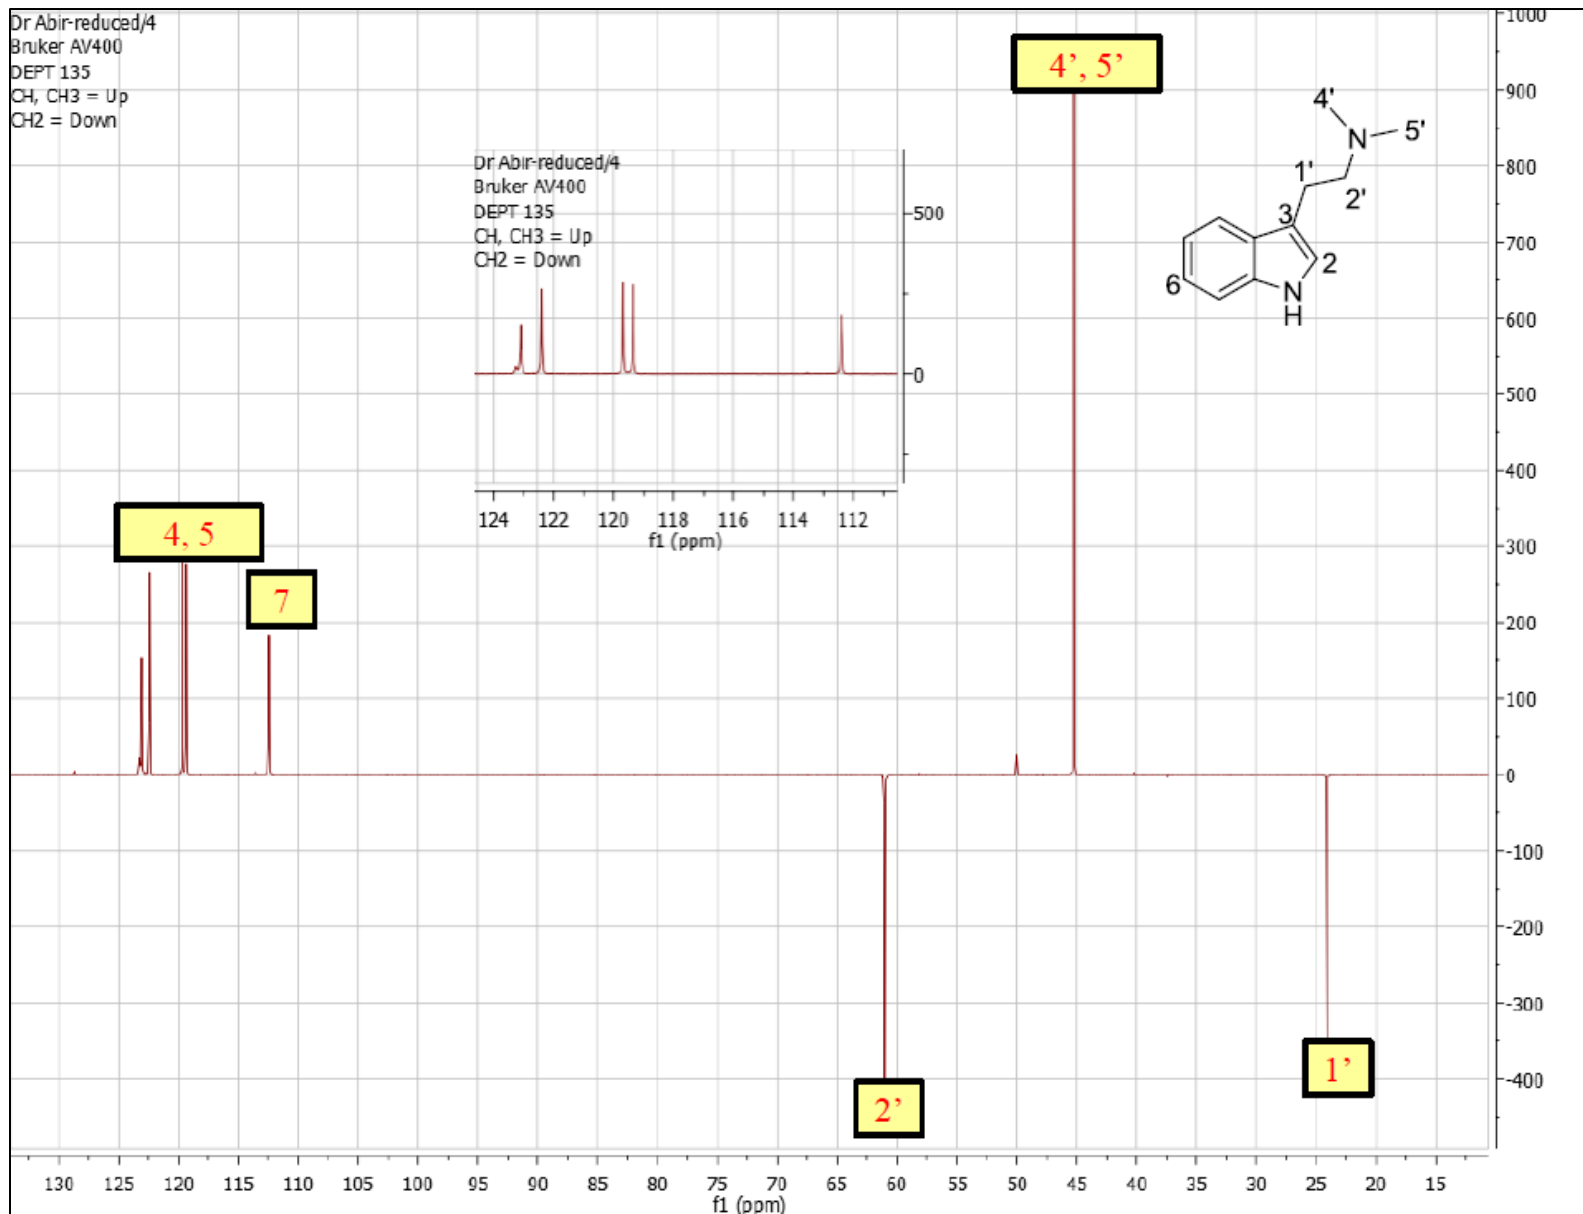

**Figure 13.**  $^{135}\text{C}$  DEPT spectrum of 2-(1*H*-indol-3-yl)-*N,N*-dimethylethanamine (**2a**) in methanol- $d_4$  (400 MHz)

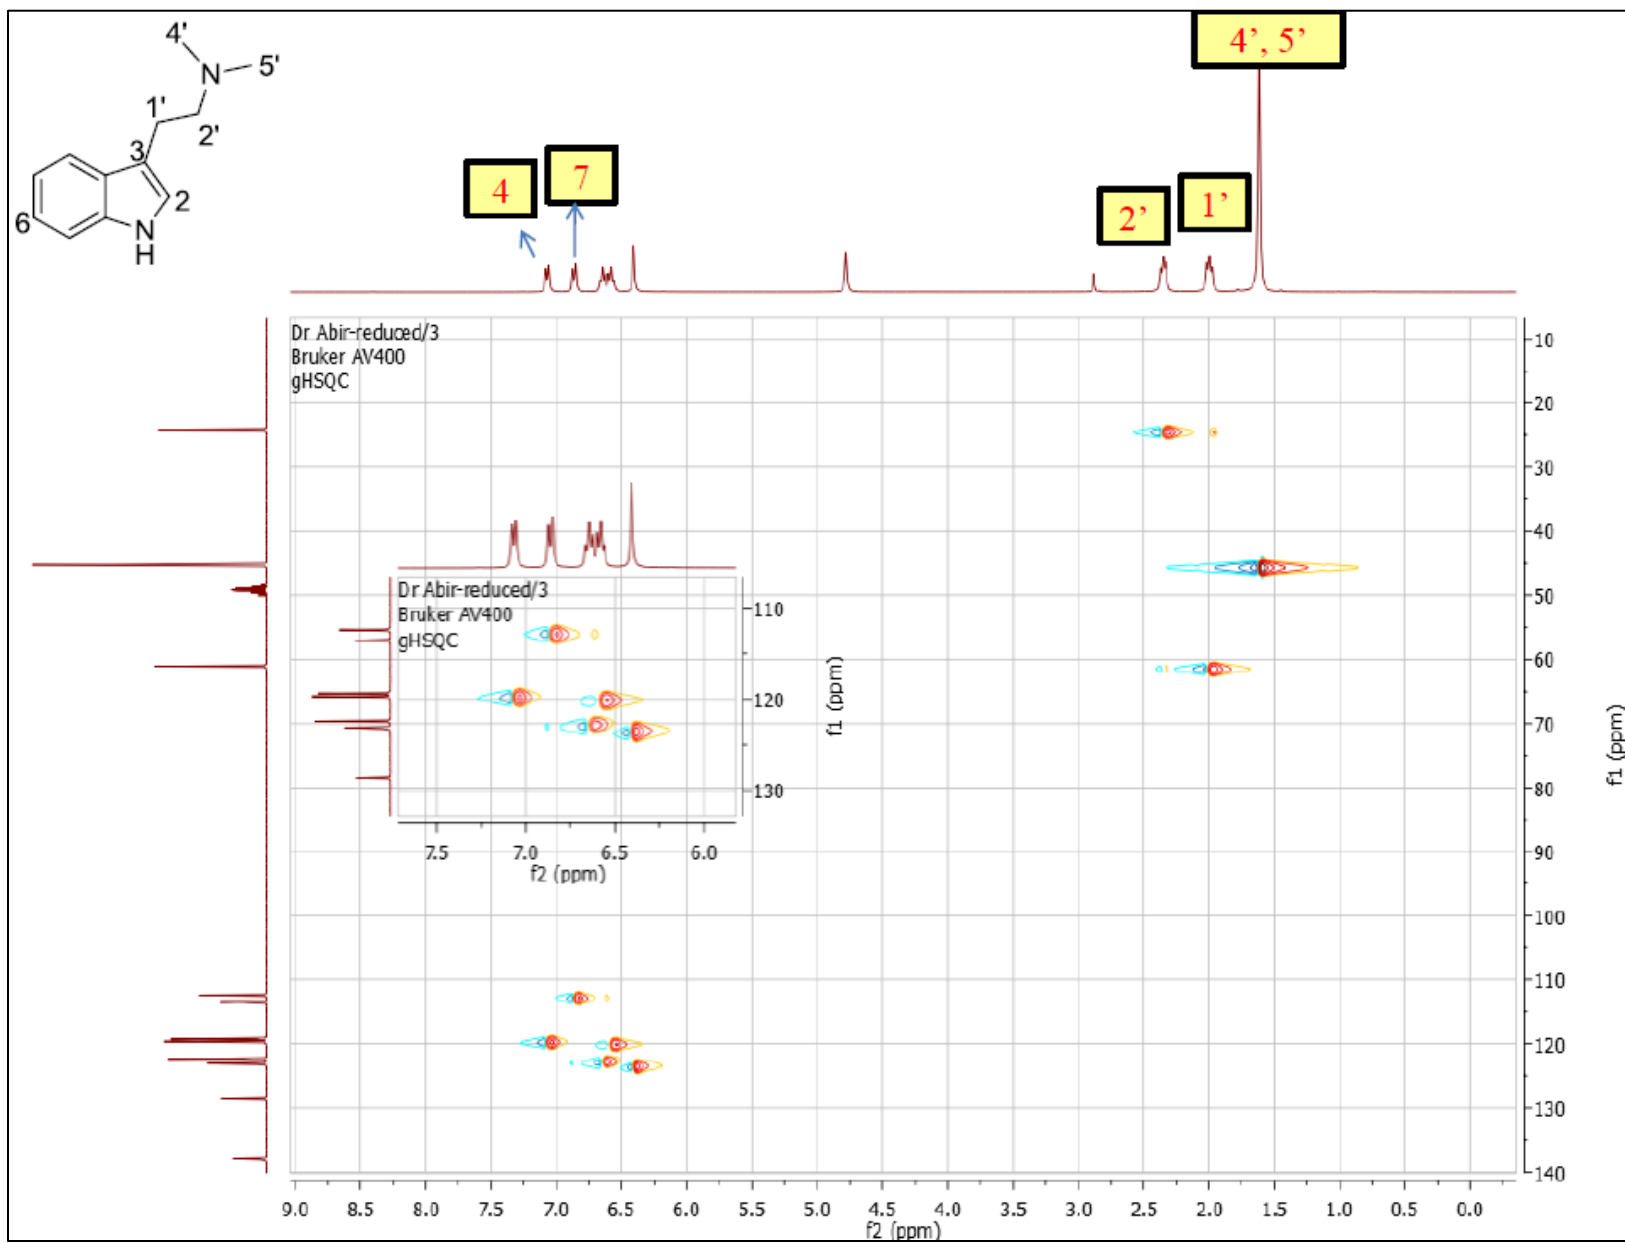

**Figure 14.** HSQC spectrum of 2-(1*H*-indol-3-yl)-*N,N*-dimethylethanamine (2a) in methanol- $d_4$  (400 MHz)

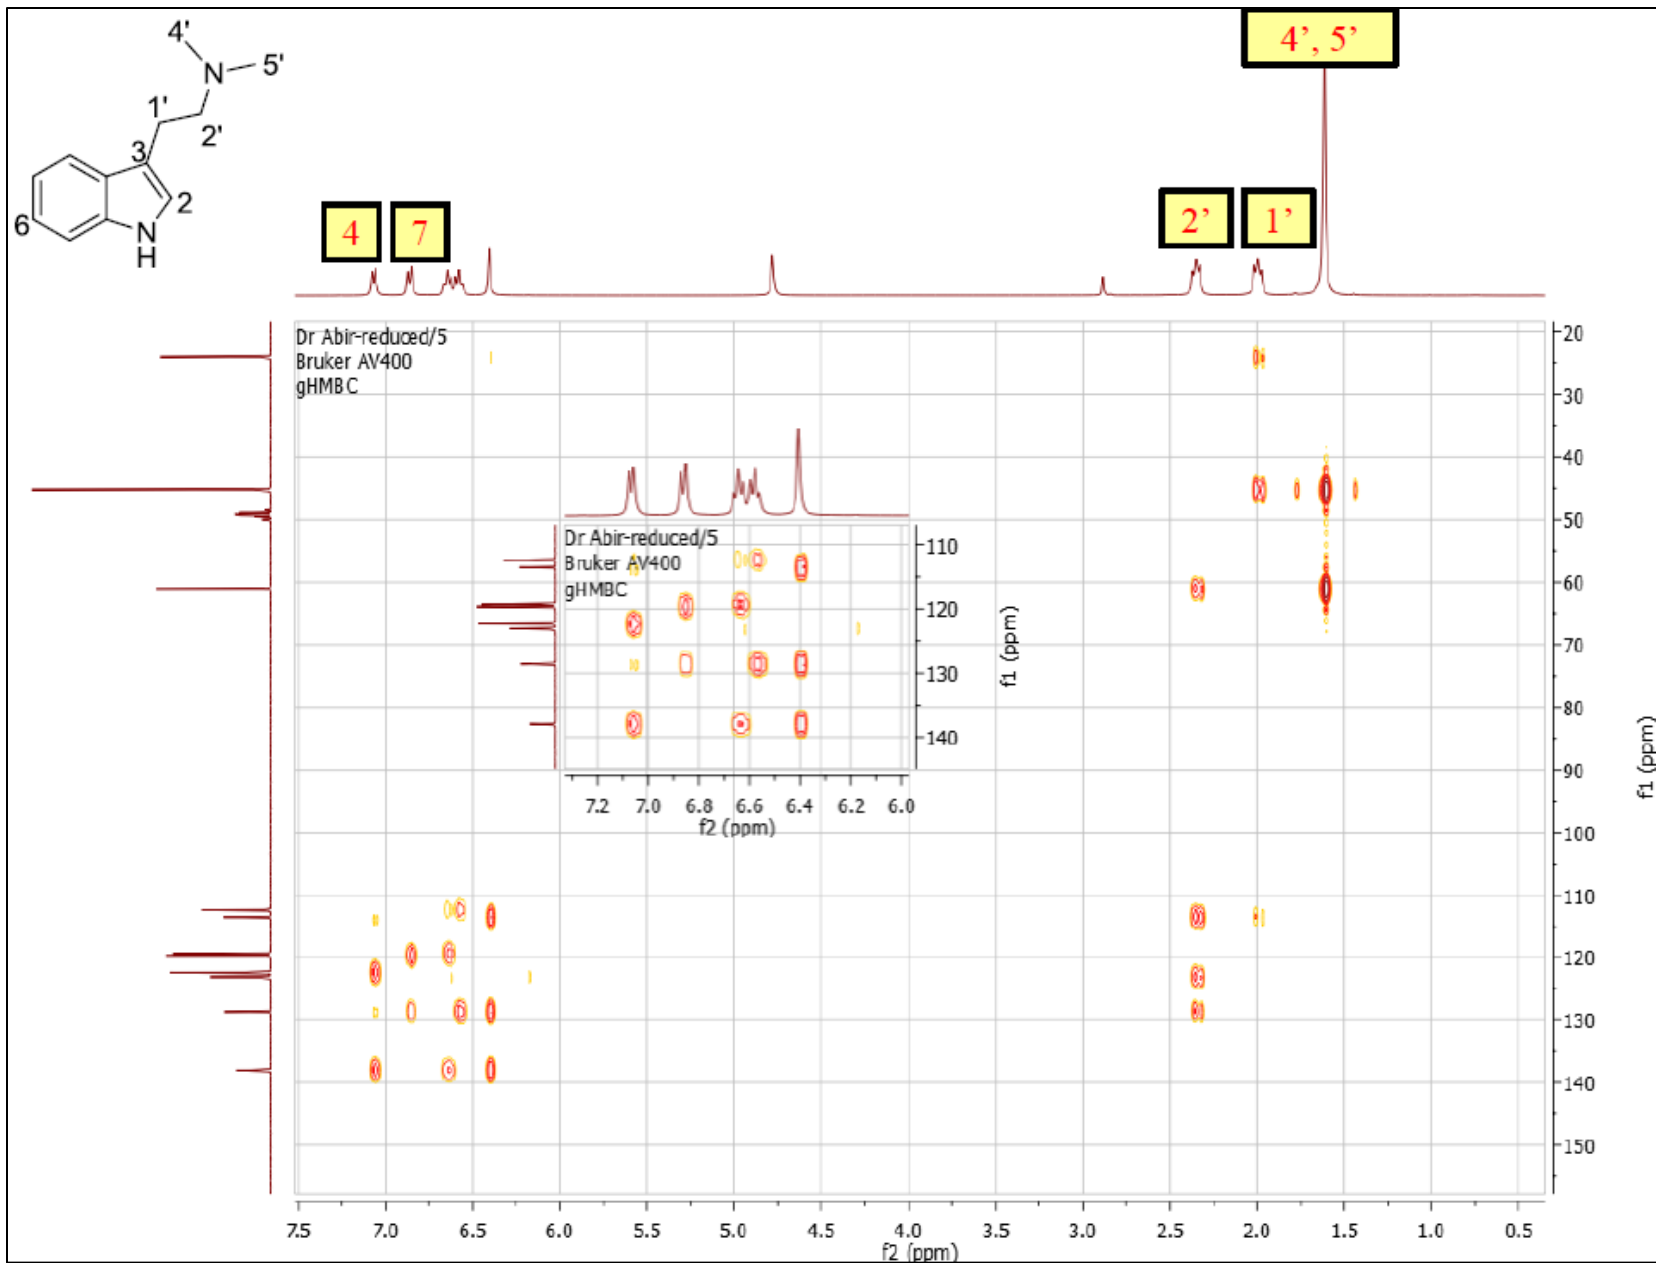

Figure 15. HMBC spectrum of 2-(1H-indol-3-yl)-N,N-dimethylethanamine (**2a**) in methanol-*d*<sub>4</sub> (400 MHz)



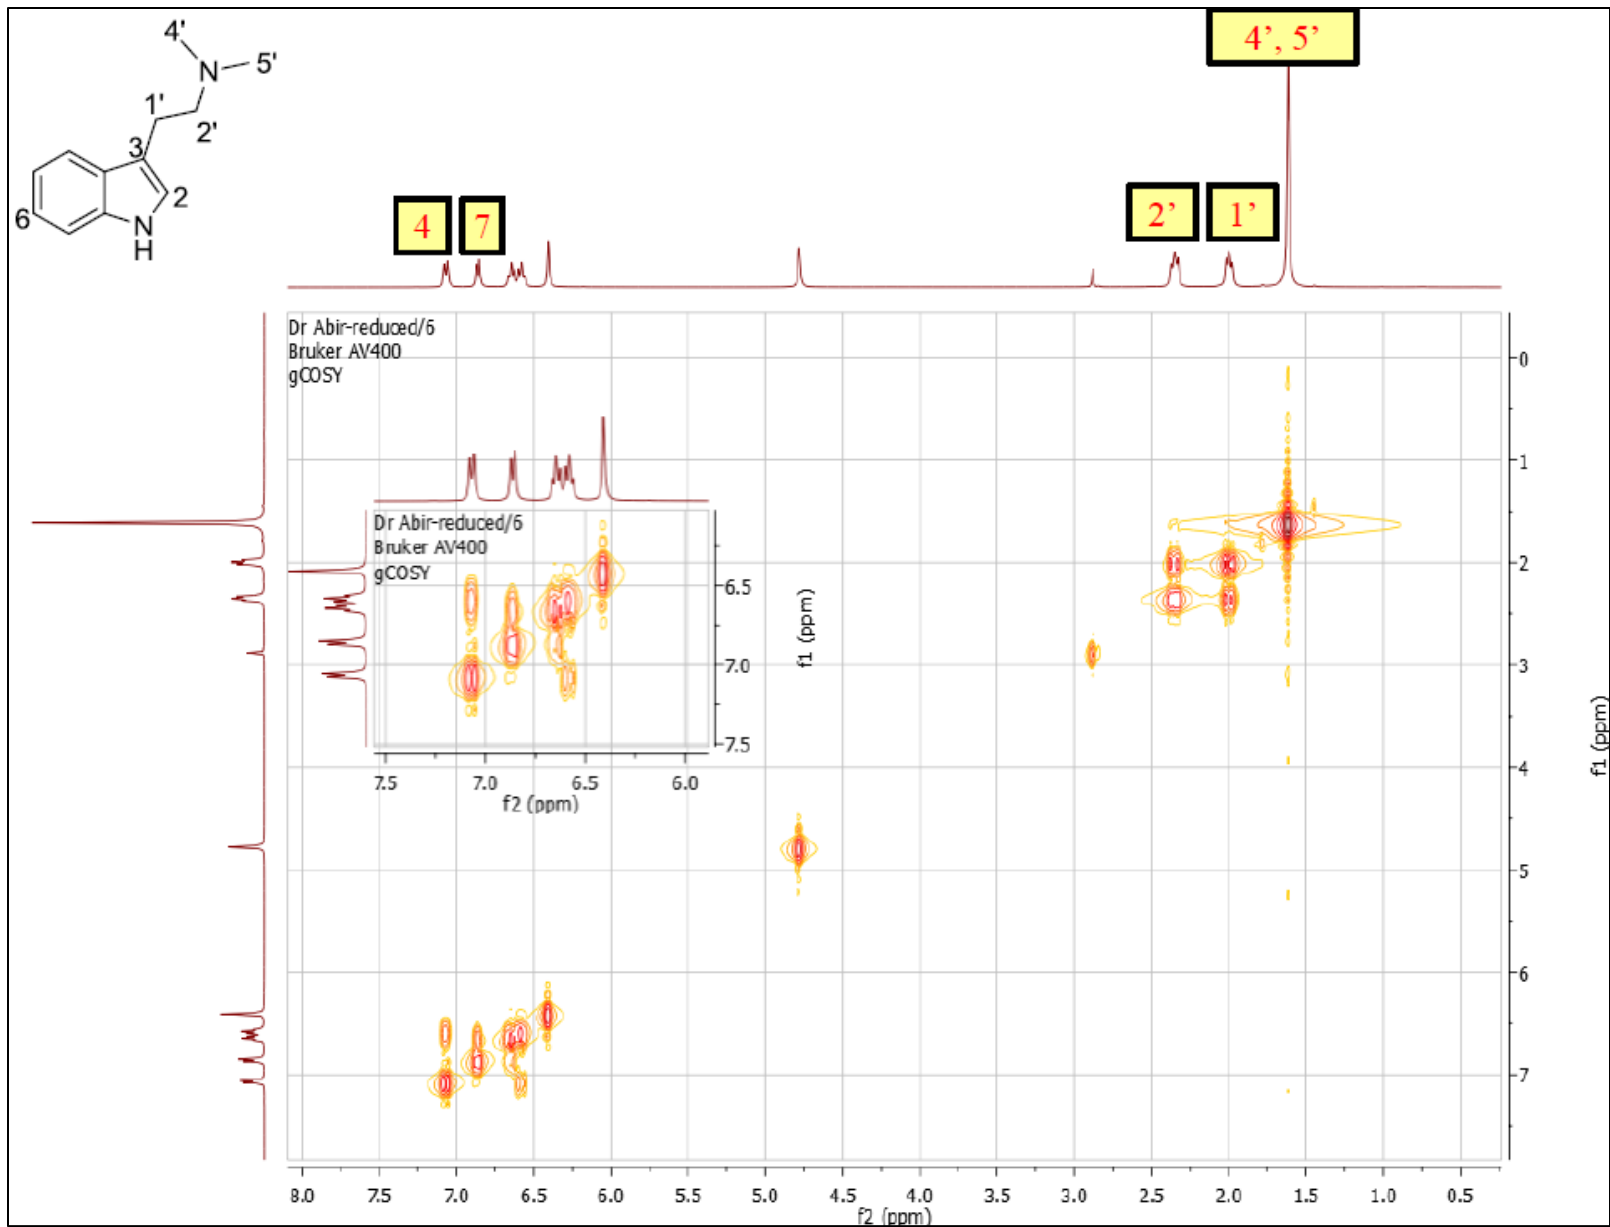

**Figure 16.** COSY spectrum of 2-(1H-indol-3-yl)-N,N-dimethylethanamine (**2a**) in methanol- $d_4$  (400 MHz)

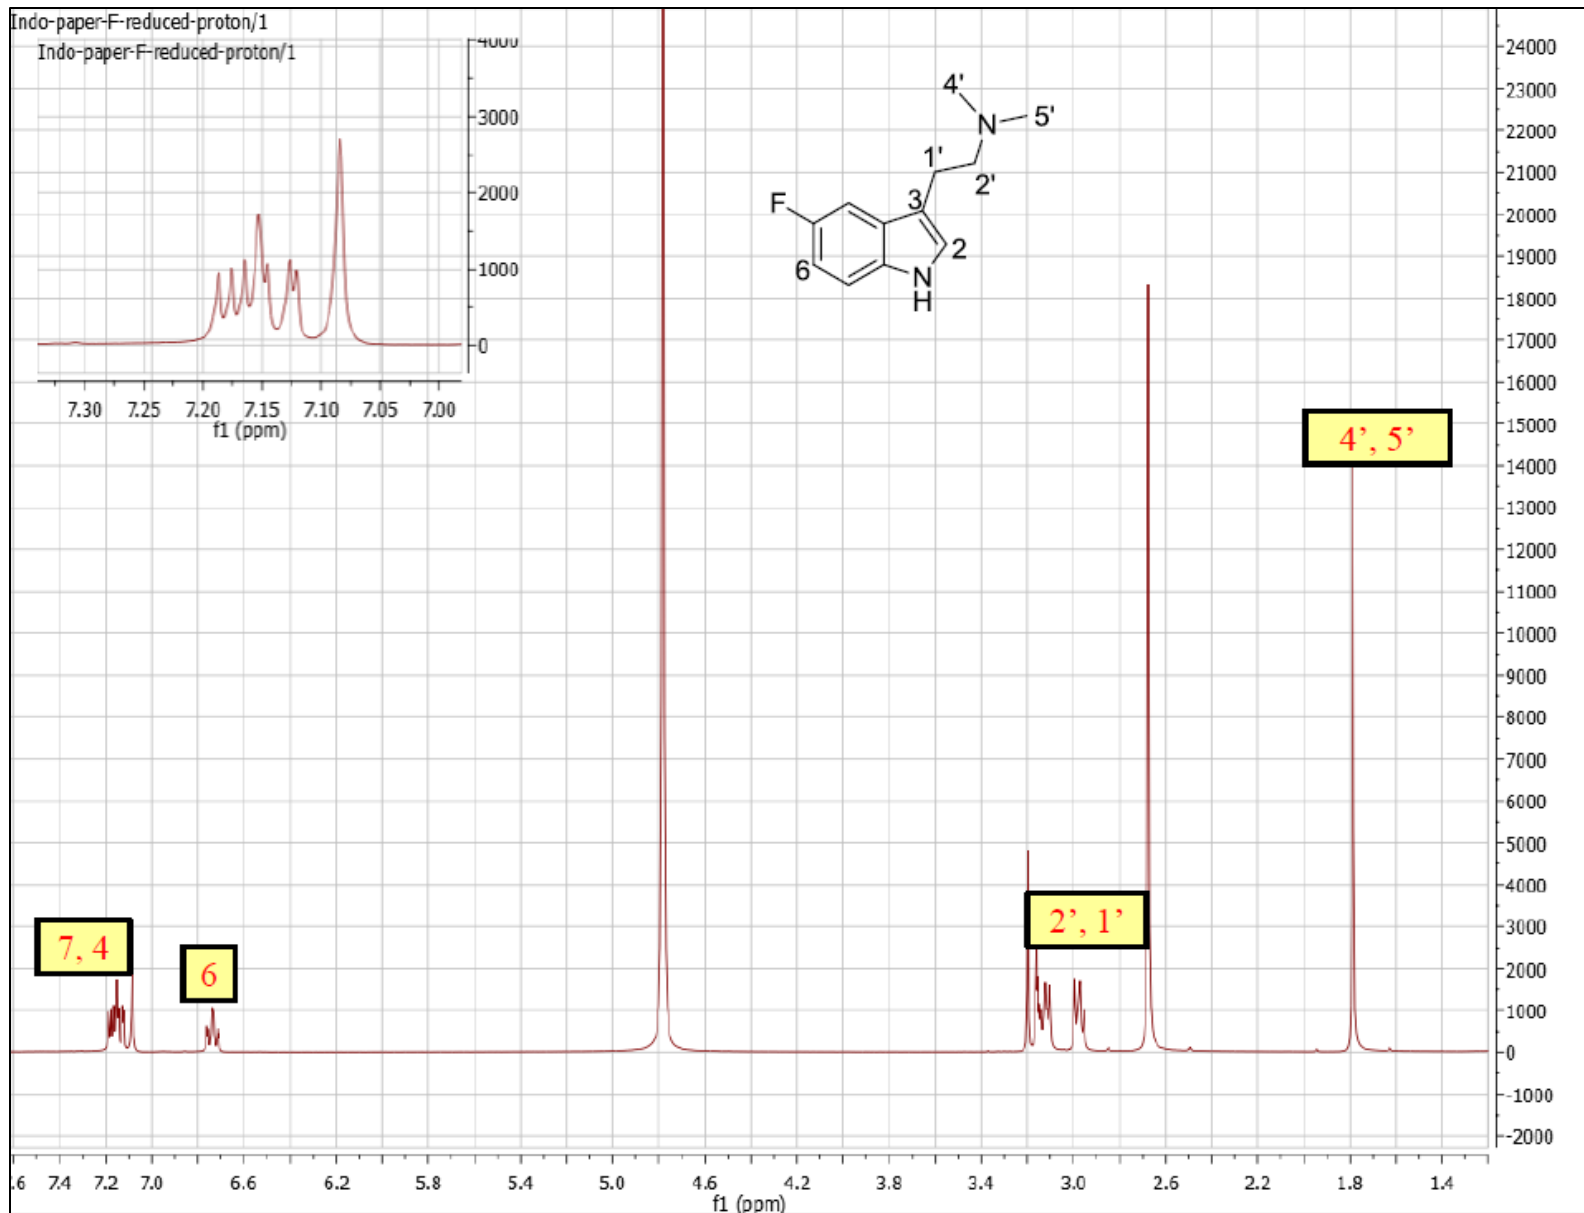

**Figure 17.**  $^1\text{H}$  NMR spectrum of 2-(5-fluoro-1H-indol-3-yl)-*N,N*-dimethylethanamine (**2b**) in methanol- $d_4$  (400 MHz)

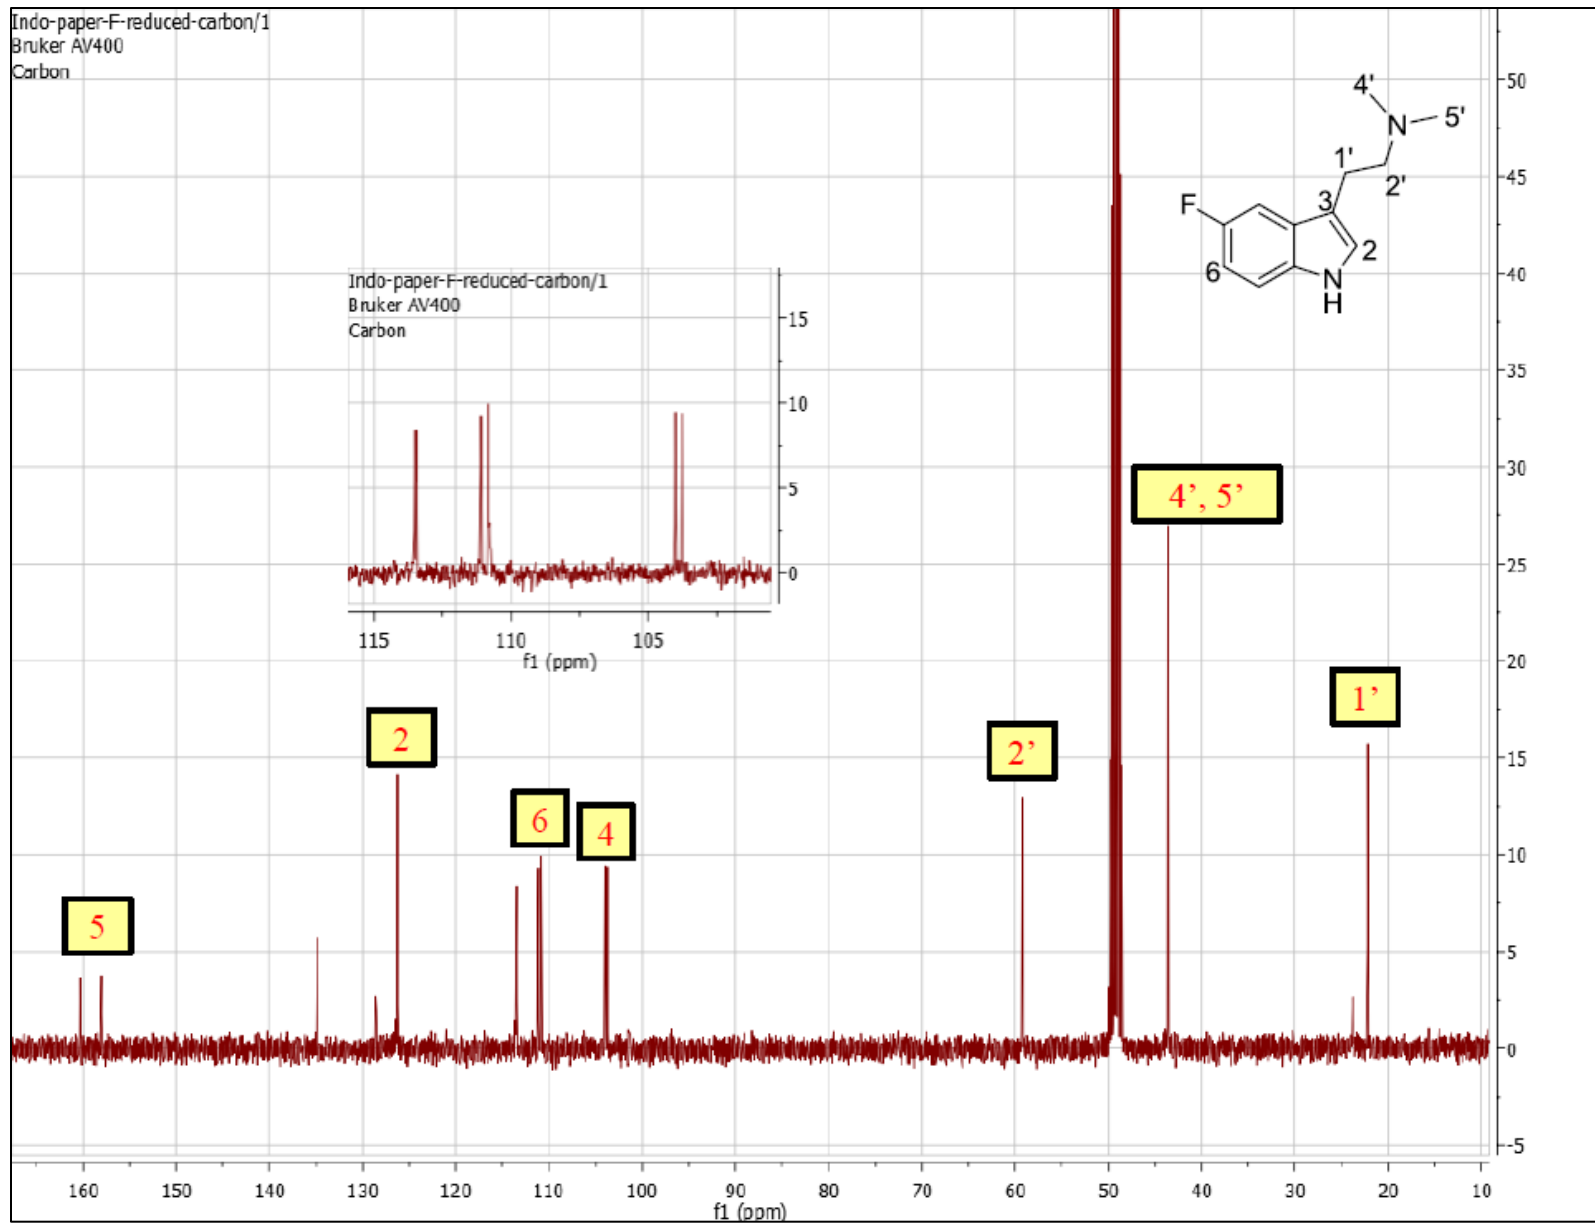

Figure 18.  $^{13}\text{C}$  NMR spectrum of 2-(5-fluoro-1H-indol-3-yl)-N,N-dimethylethanamine (**2b**) in methanol- $d_4$  (400 MHz)

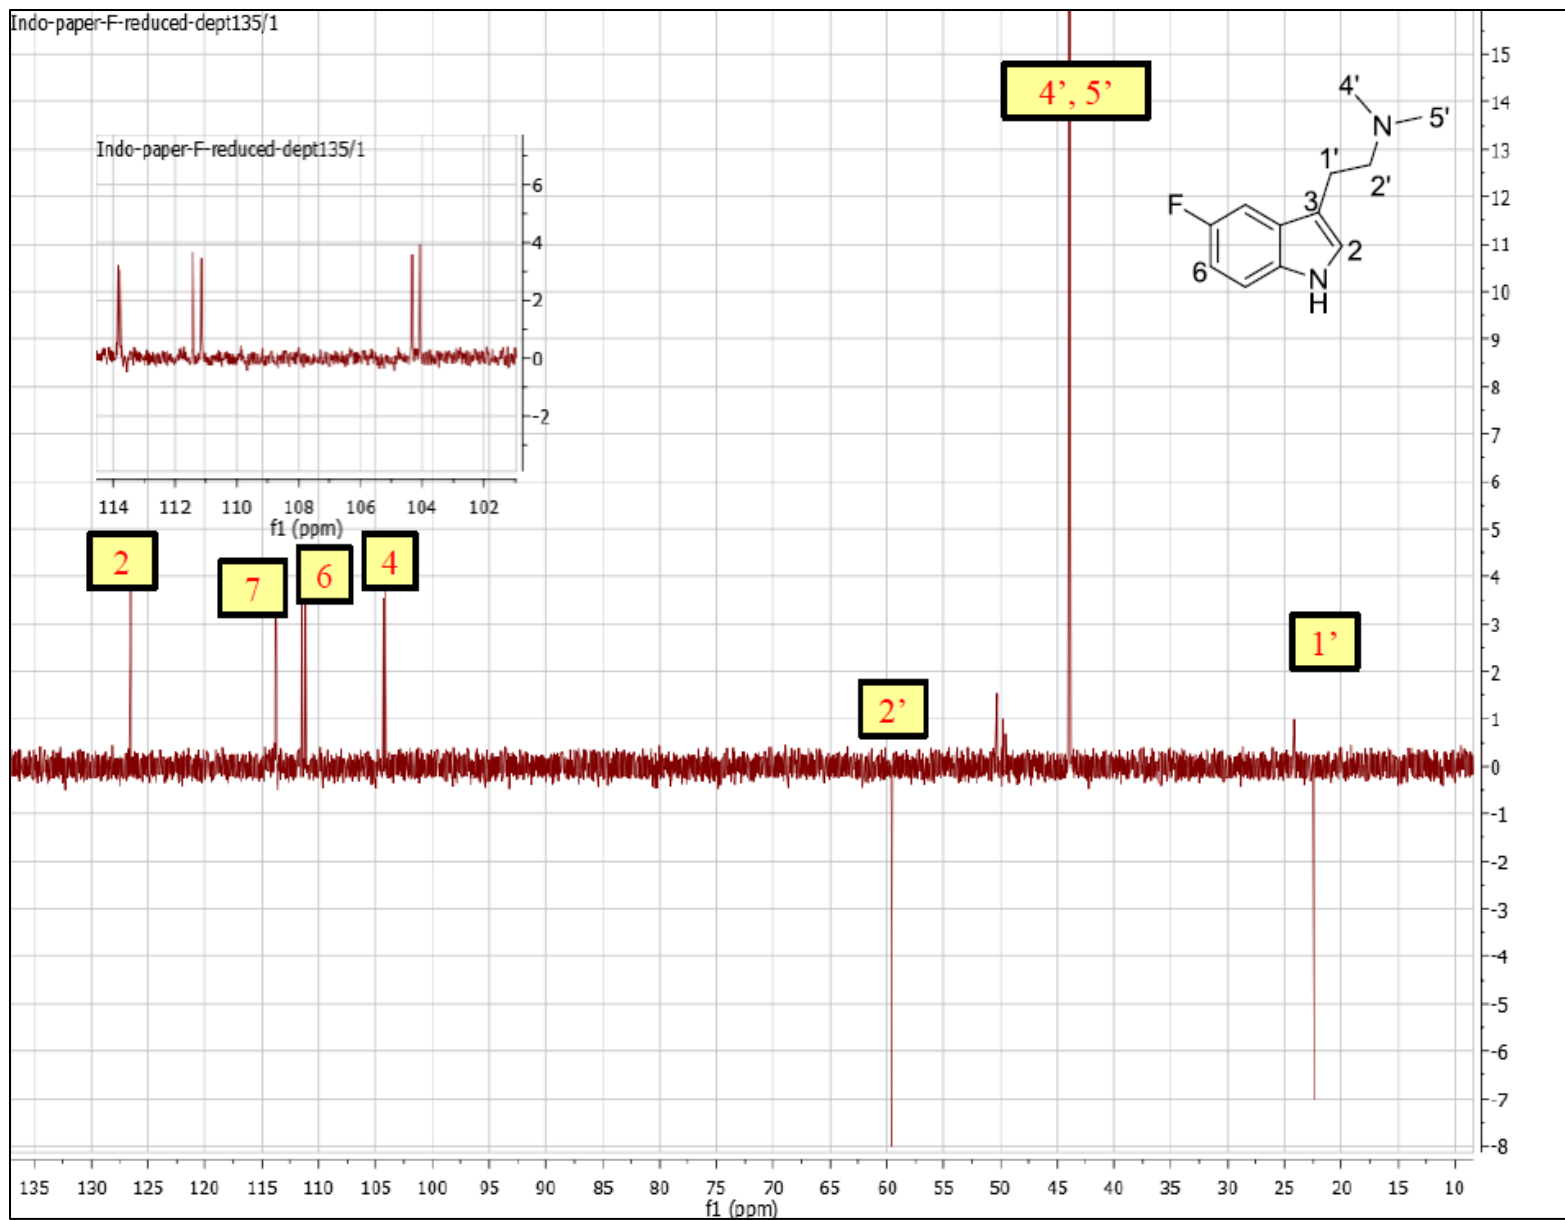

**Figure 19.**  $^{135}\text{O}$  DEPT spectrum of 2-(5-fluoro-1H-indol-3-yl)-N,N-dimethylethanamine (**2b**) in methanol- $d_4$  (400 MHz)

## Generic Display Report (all)

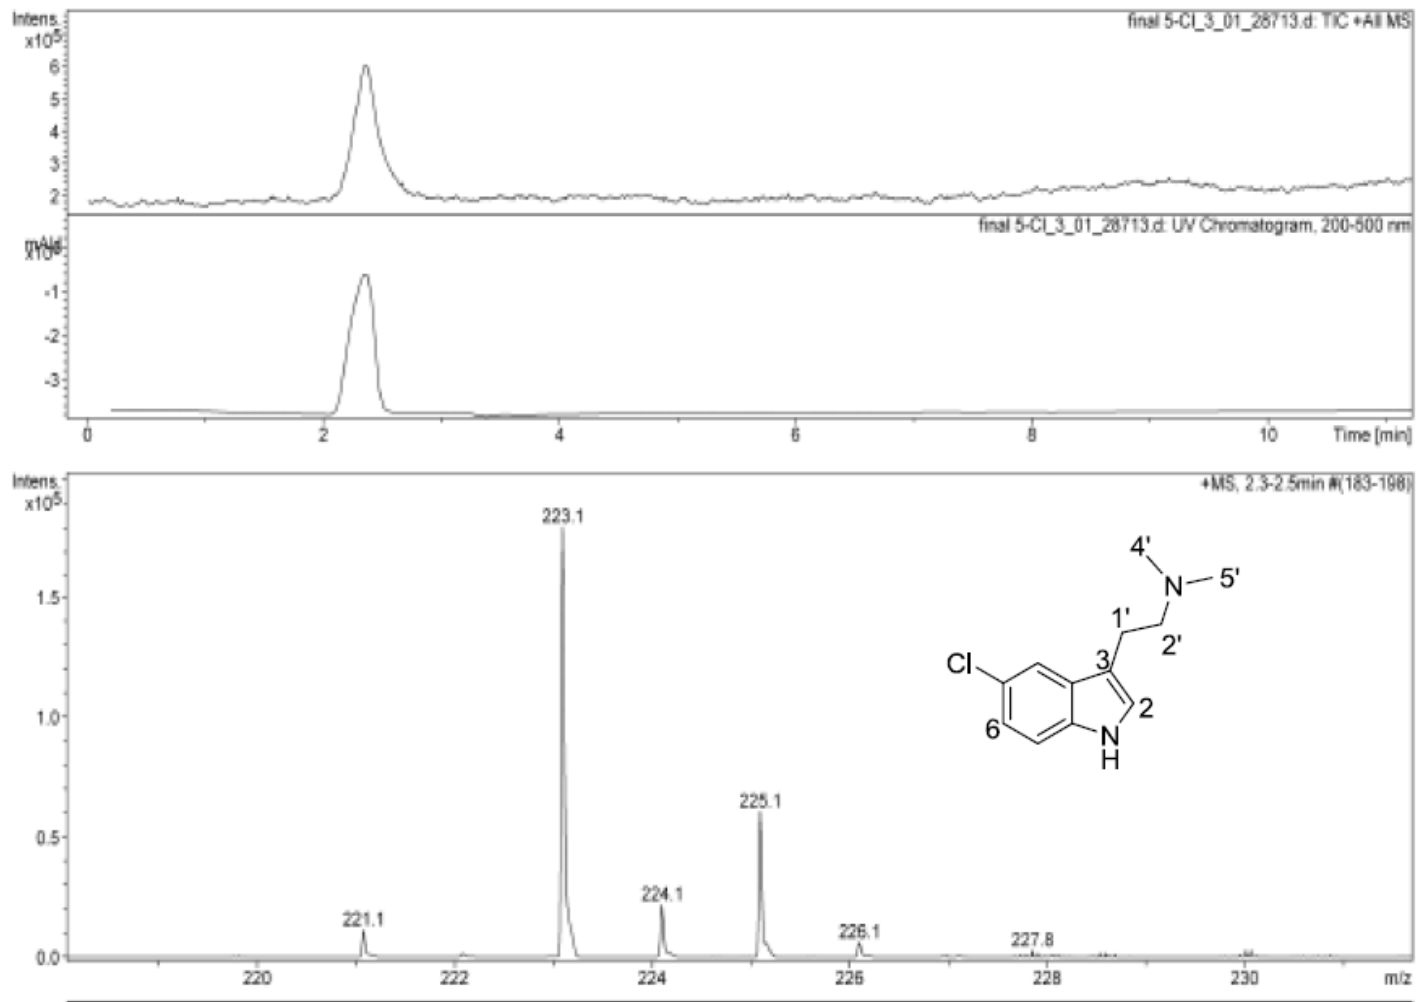

Figure 20. LC/MS chromatogram of 2-(5-chloro-1H-indol-3-yl)-N,N-dimethylethanamine (2c)

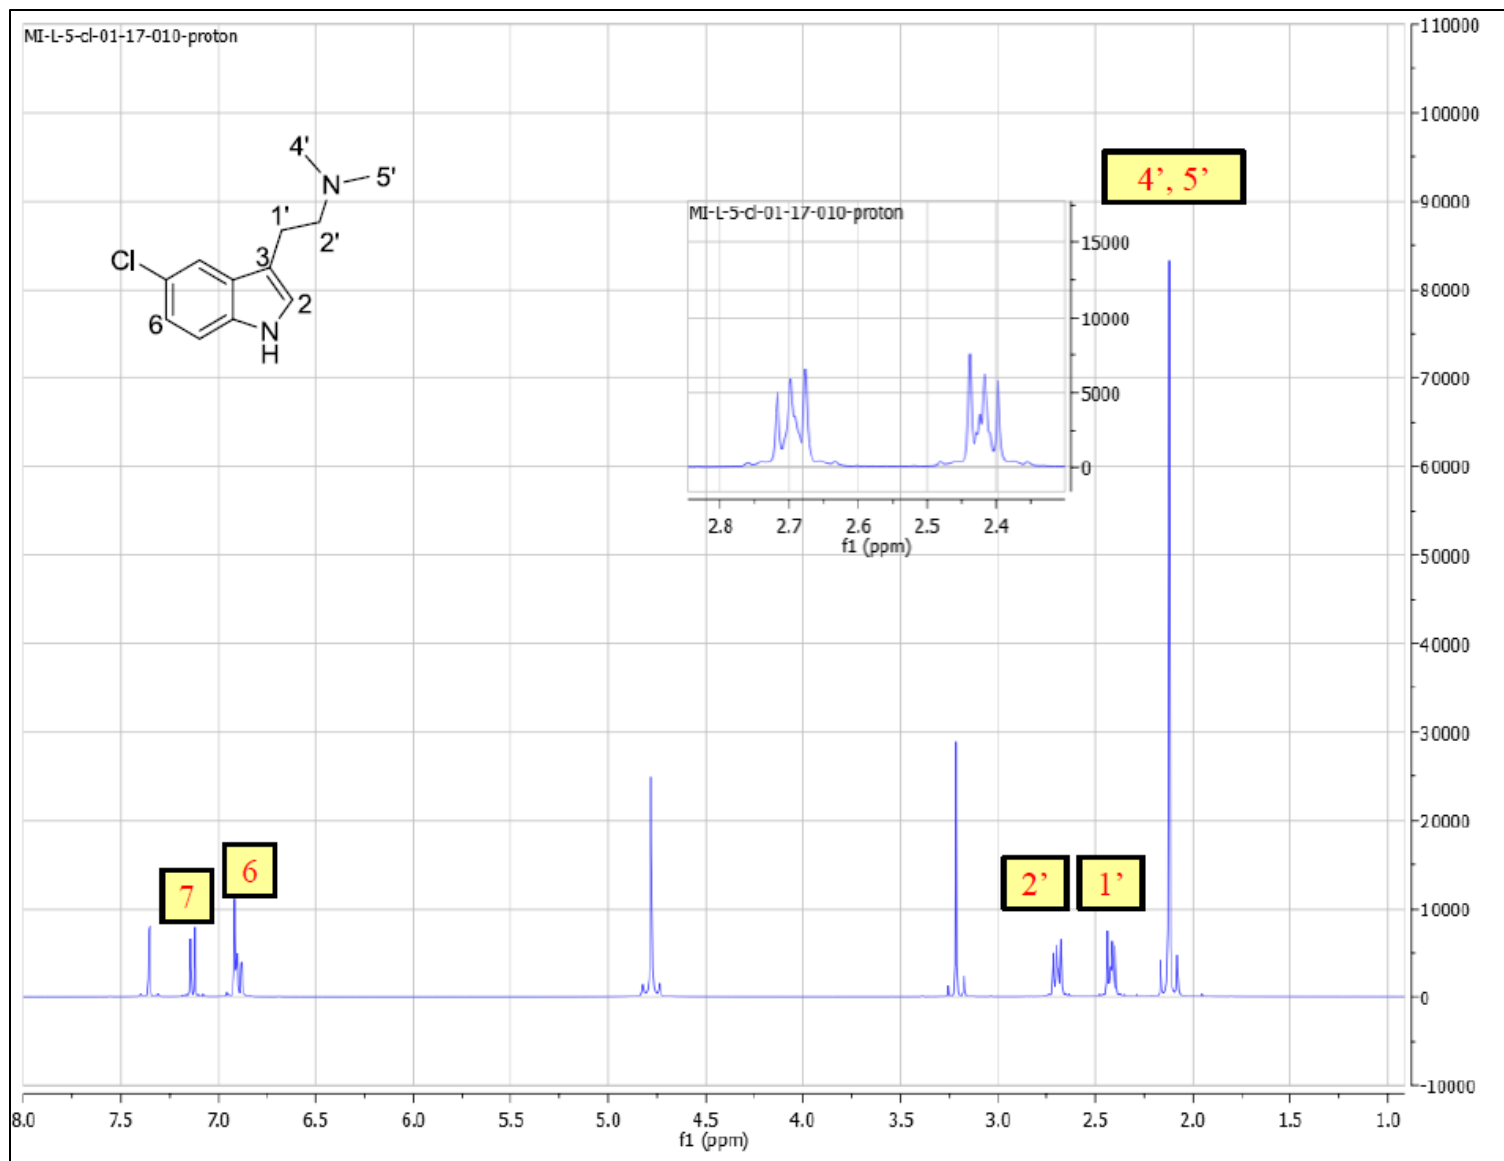

**Figure 21.** <sup>1</sup>H NMR spectrum of 2-(5-chloro-1*H*-indol-3-yl)-*N,N*-dimethylethanamine (**2c**) in methanol-*d*<sub>4</sub> (400 MHz)

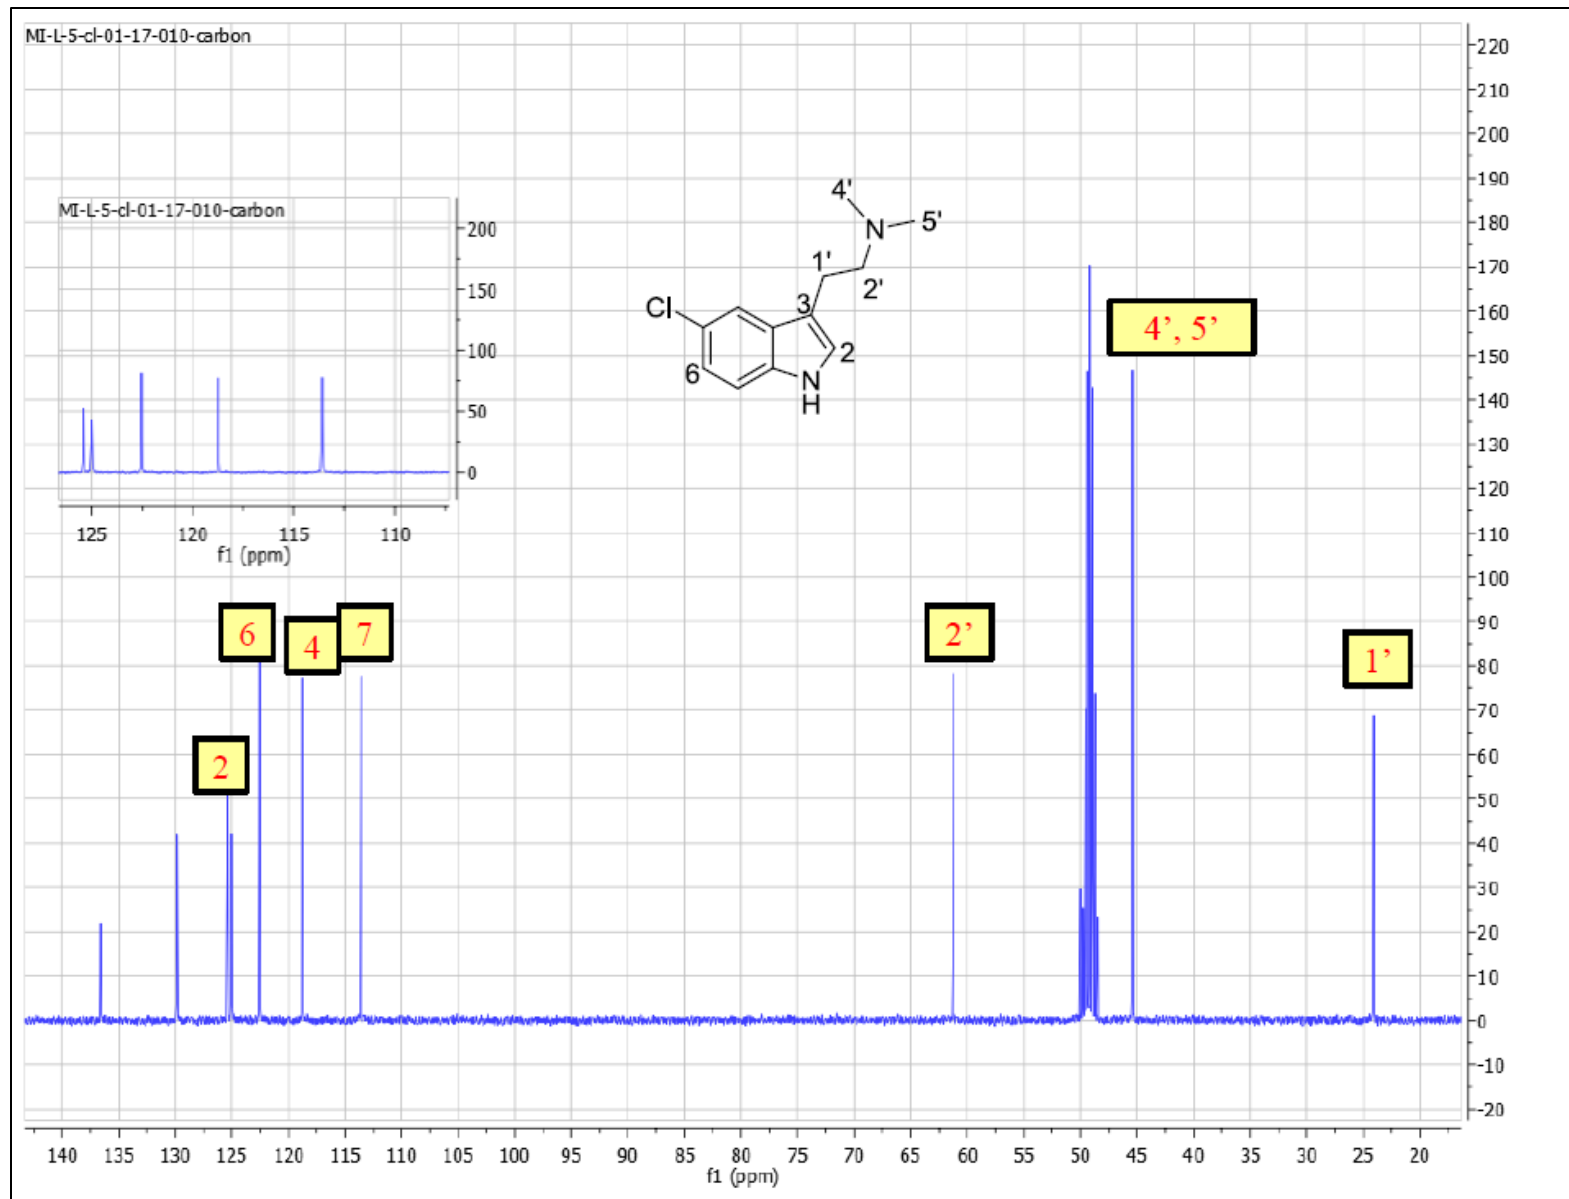

**Figure 22.**  $^{13}\text{C}$  NMR spectrum of 2-(5-chloro-1H-indol-3-yl)-N,N-dimethylethanamine (**2c**) in methanol- $d_4$  (400 MHz)

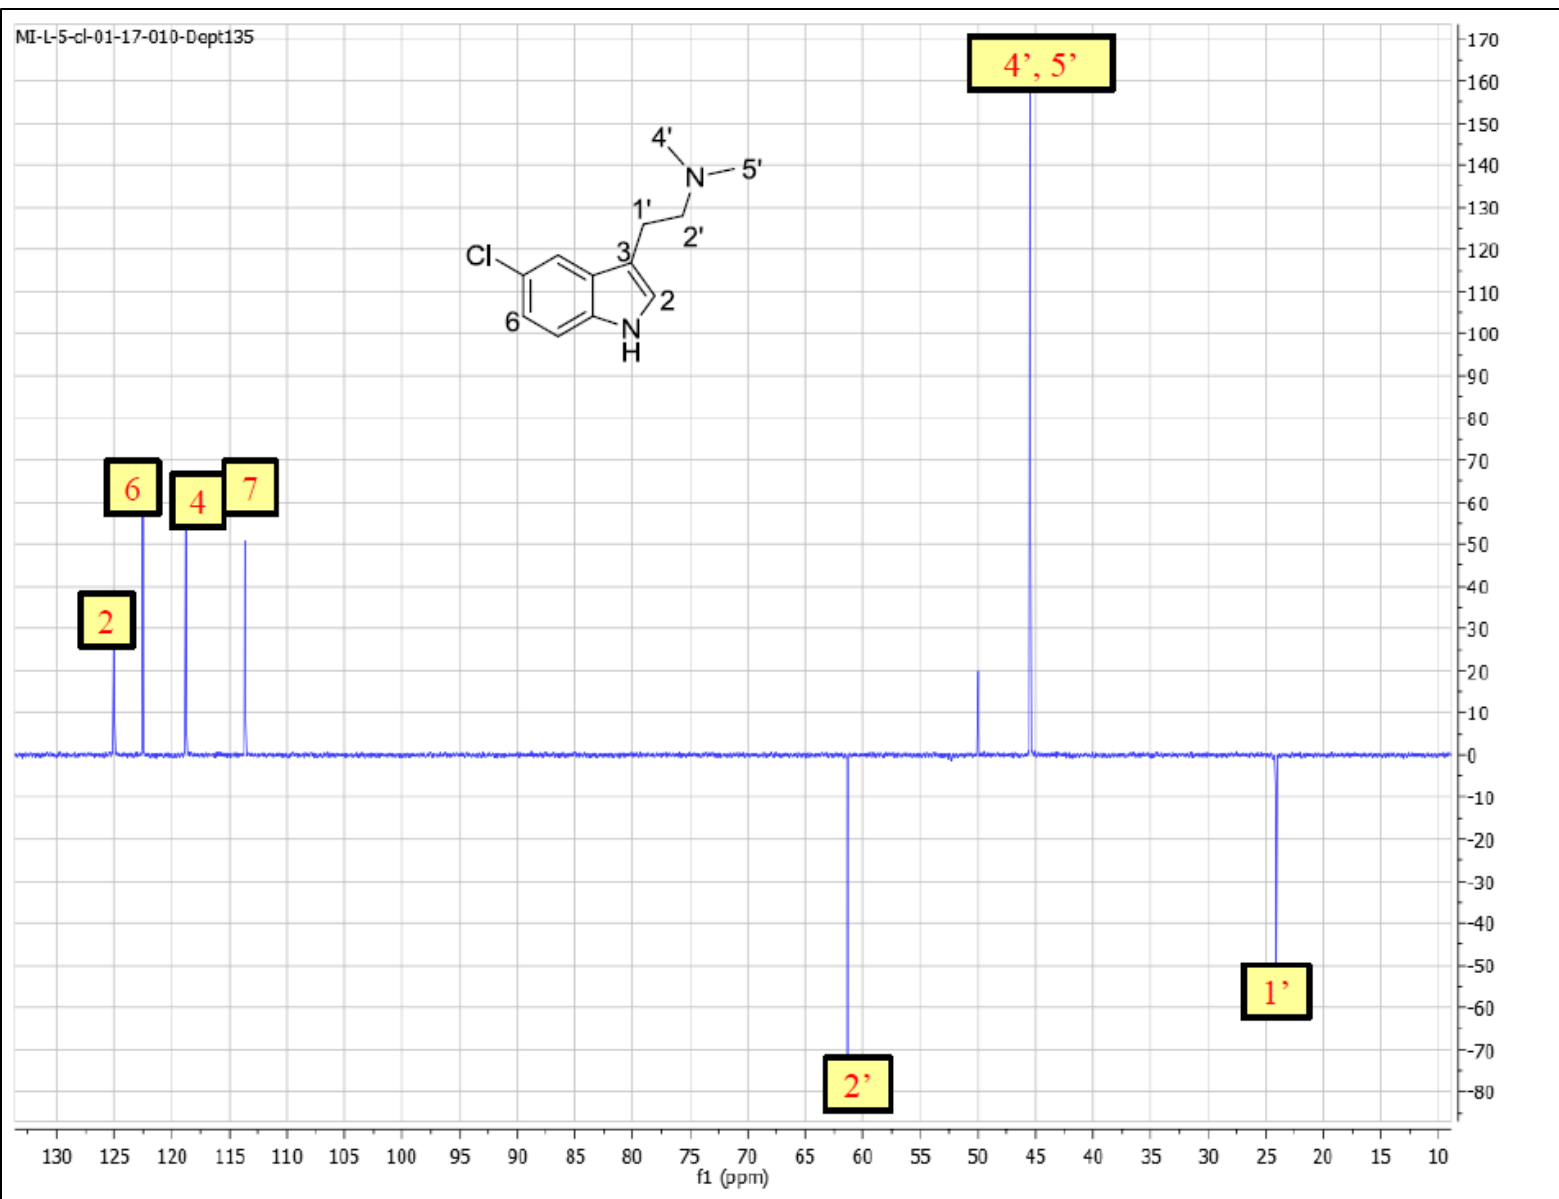

**Figure 23.**  $^{135}\text{C}$  DEPT spectrum of 2-(5-chloro-1H-indol-3-yl)-N,N-dimethylethanamine (2c) in methanol- $d_4$  (400 MHz)



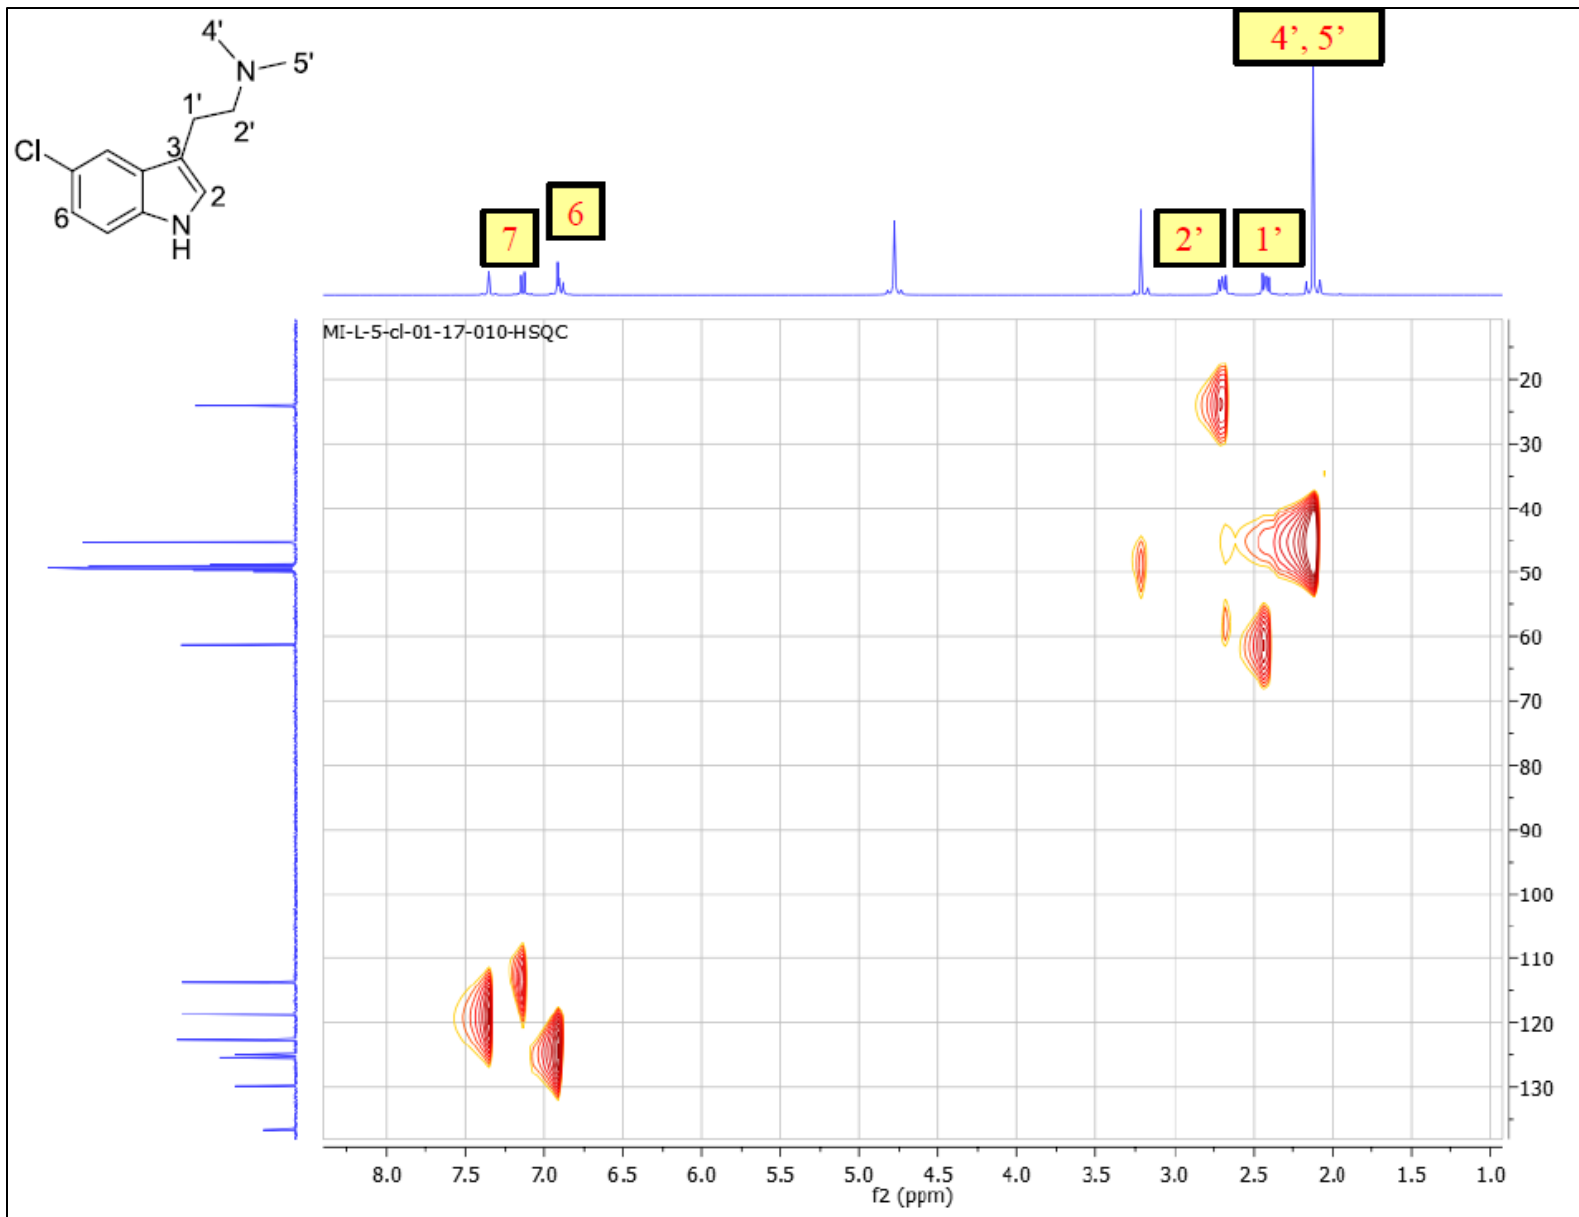

**Figure 24.** HSQC spectrum of 2-(5-chloro-1H-indol-3-yl)-N,N-dimethylethanamine (**2c**) in methanol- $d_4$  (400 MHz)

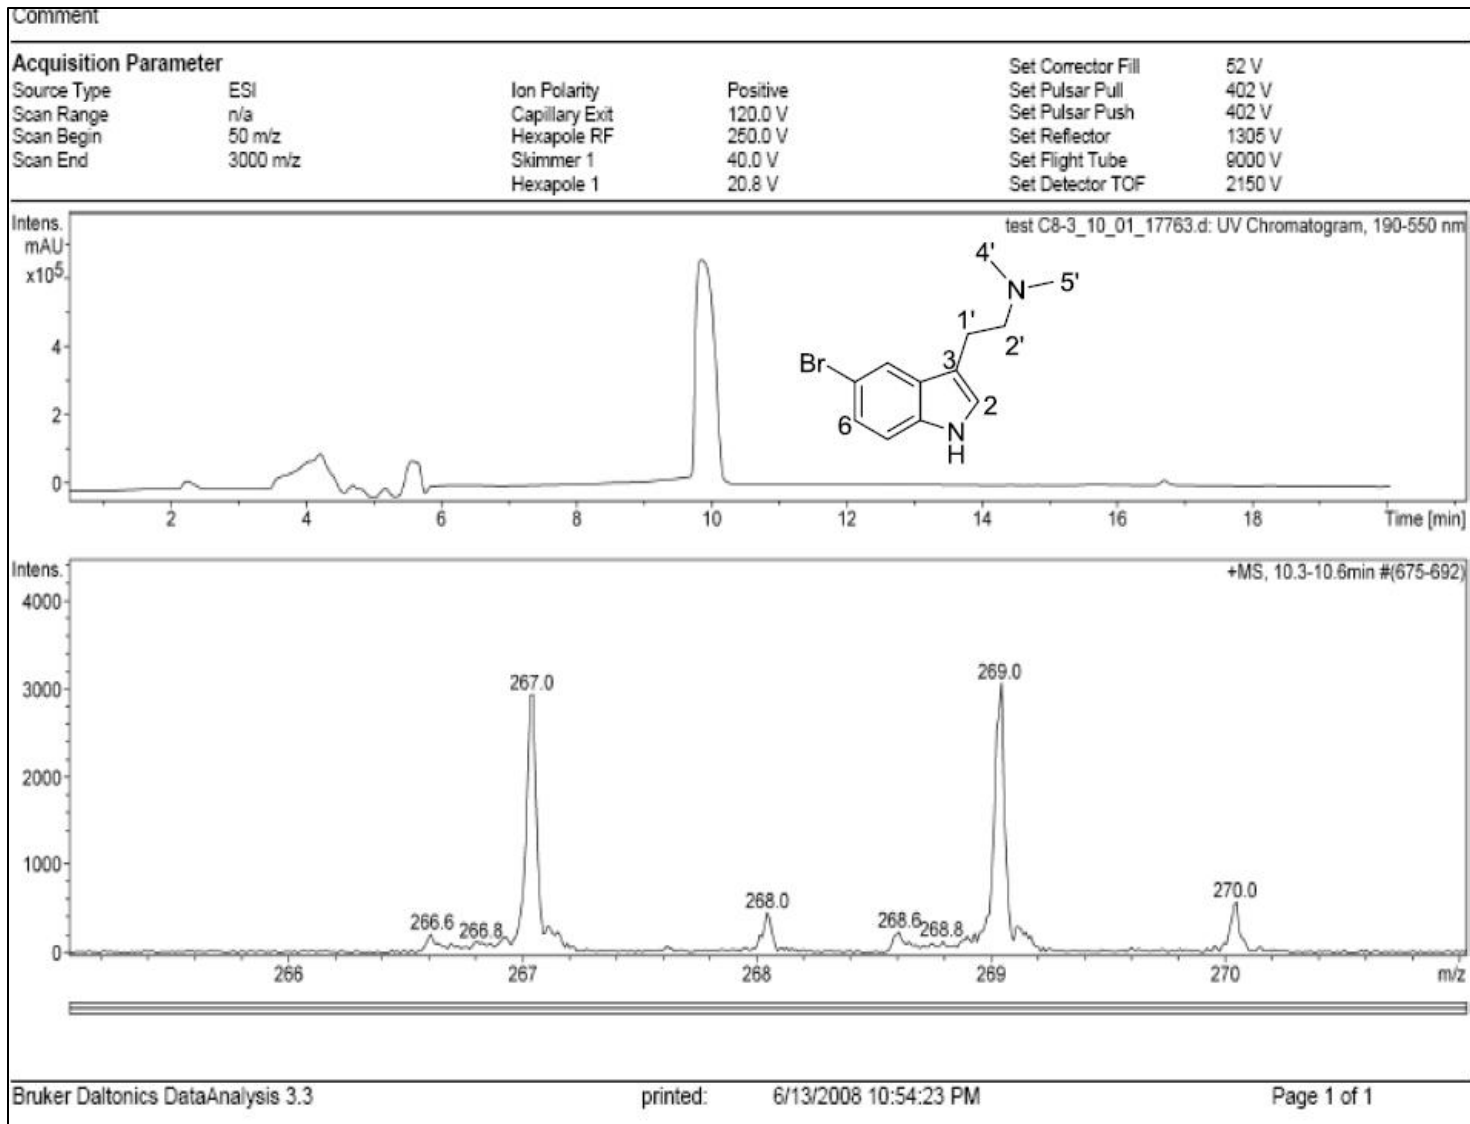

**Figure 25.** LC/MS chromatogram of 2-(5-bromo-1*H*-indol-3-yl)-*N,N*-dimethylethanamine (**2d**)

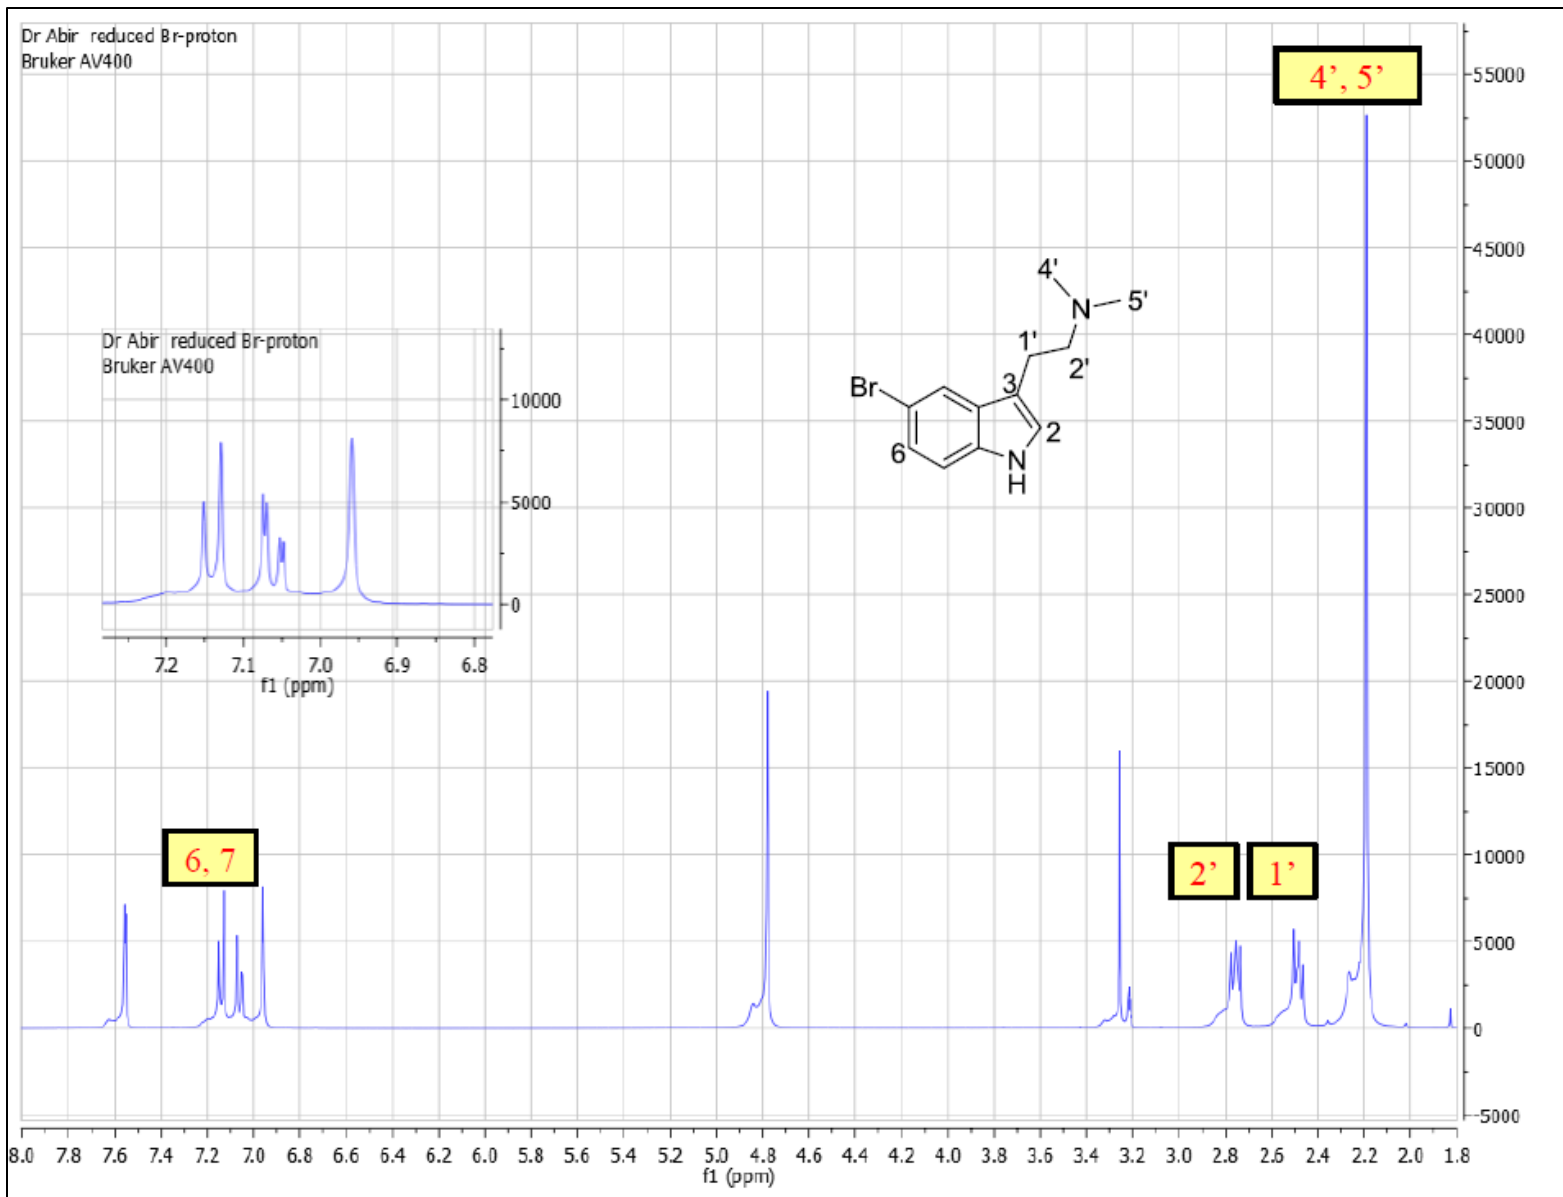

**Figure 26.**  $^1\text{H}$  NMR spectrum of 2-(5-bromo-1*H*-indol-3-yl)-*N,N*-dimethylethanamine (**2d**) in methanol- $d_4$  (400 MHz)

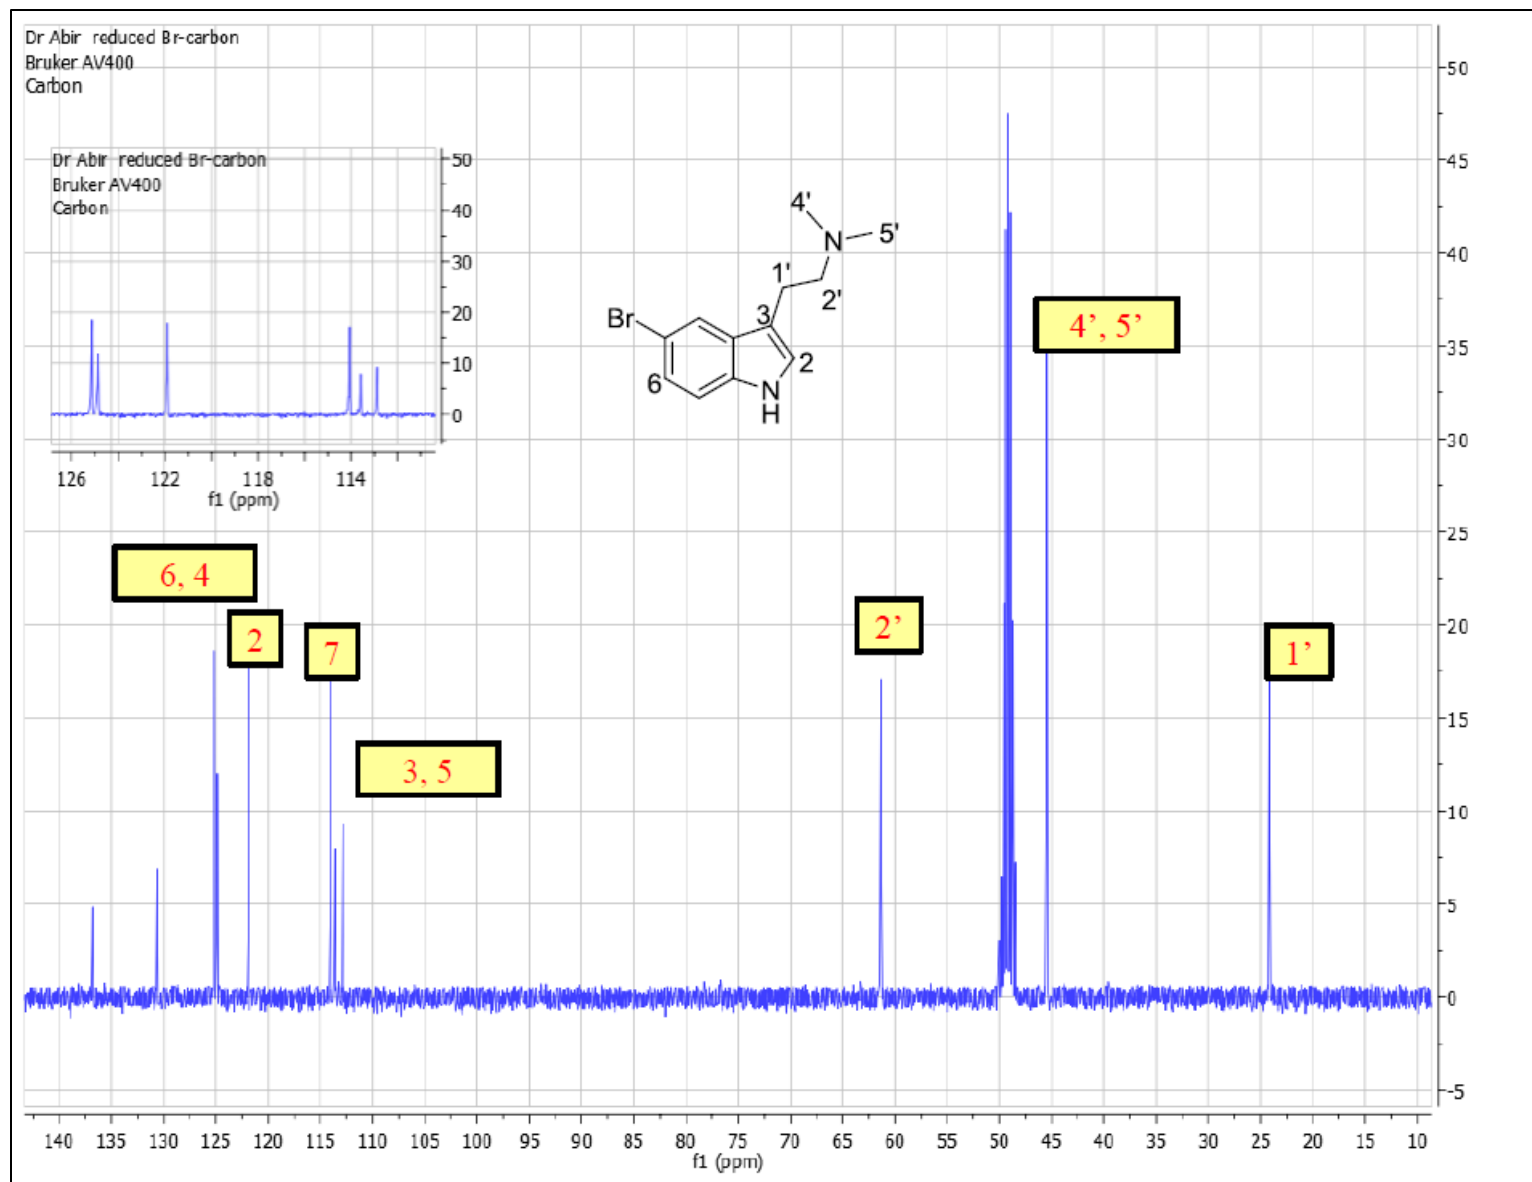

**Figure 27.**  $^{13}\text{C}$  NMR spectrum of 2-(5-bromo-1H-indol-3-yl)-N,N-dimethylethanamine (2d) in methanol- $d_4$  (400 MHz)

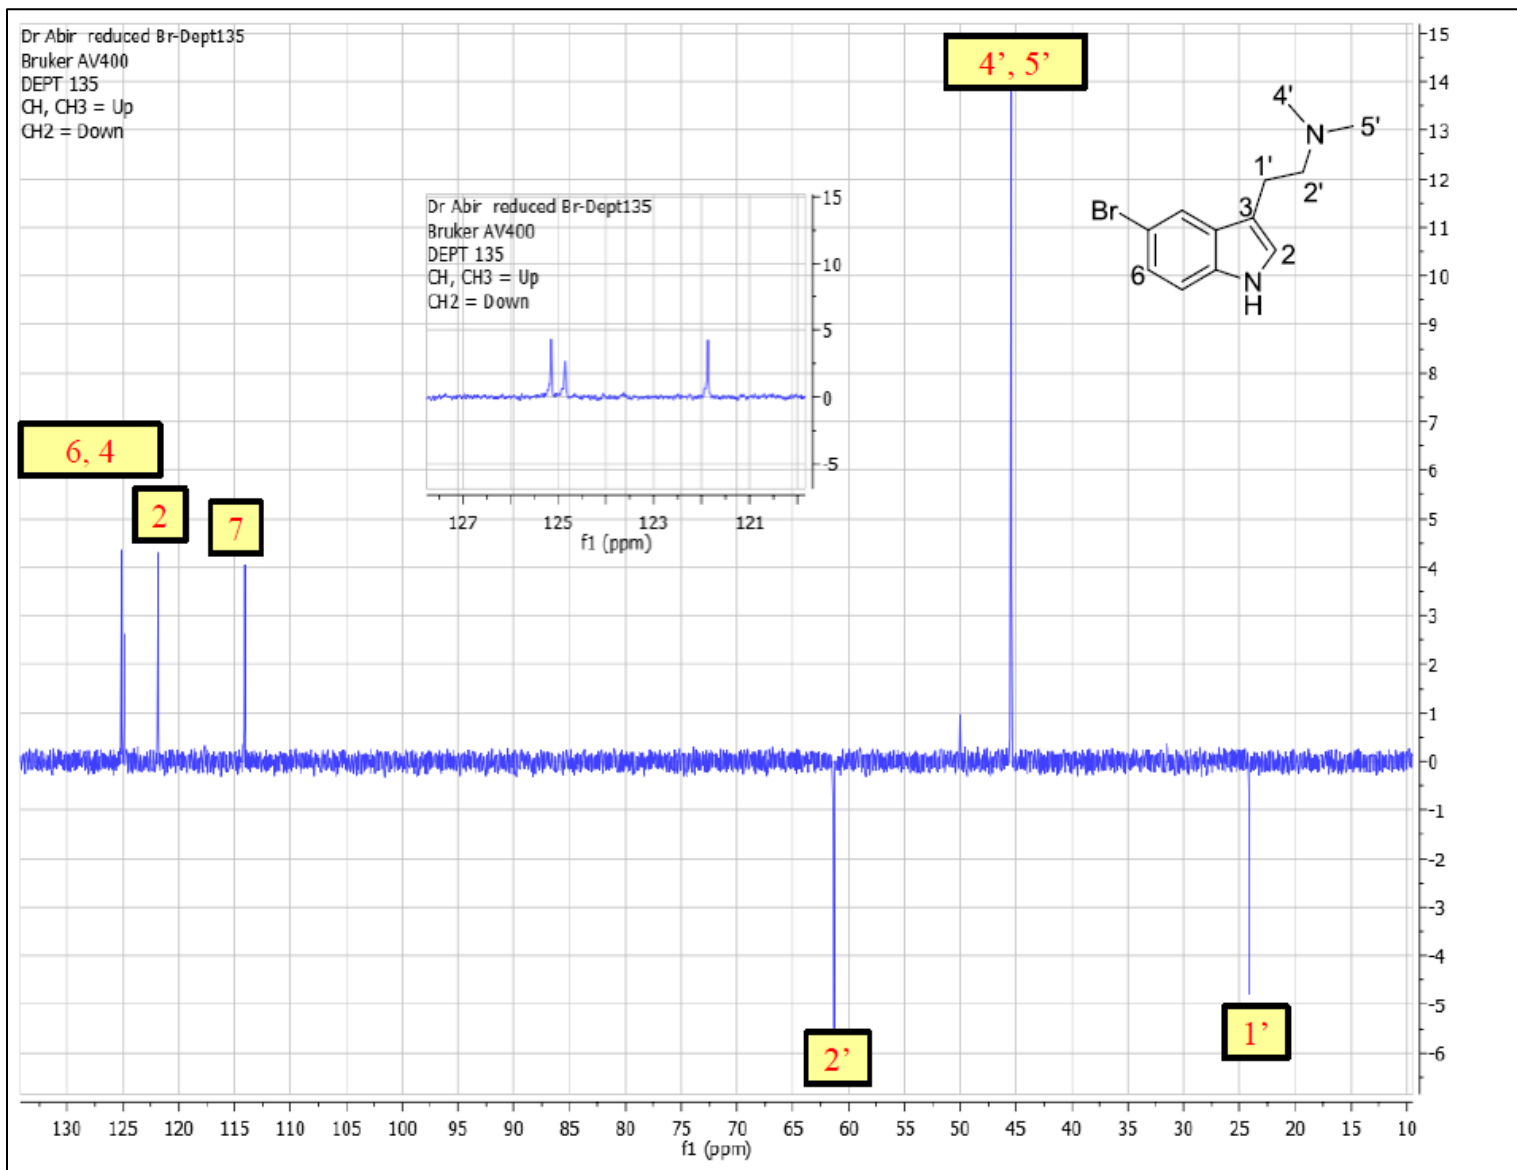

**Figure 28.**  $^{135}\text{C}$  DEPT spectrum of 2-(5-bromo-1*H*-indol-3-yl)-*N,N*-dimethylethanamine (**2d**) in methanol- $d_4$  (400 MHz)

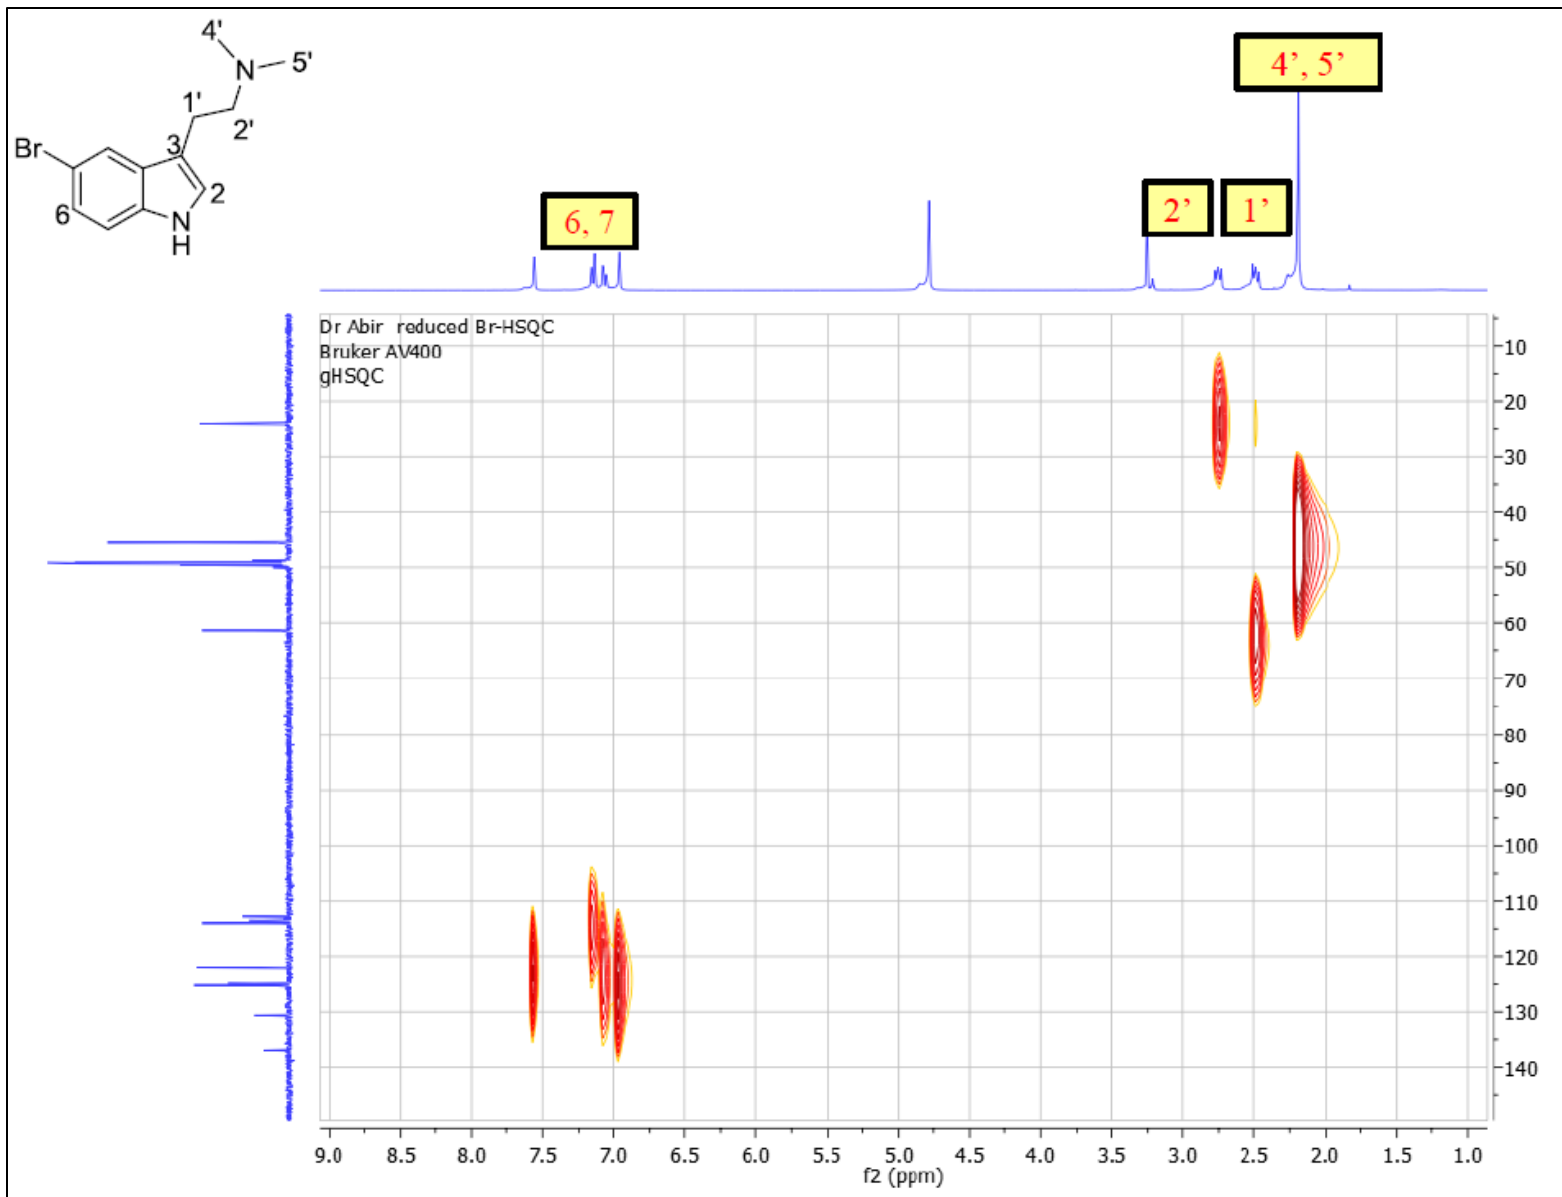

**Figure 29.** HSQC spectrum of 2-(5-bromo-1H-indol-3-yl)-N,N-dimethylethanamine (**2d**) in methanol- $d_4$  (400 MHz)

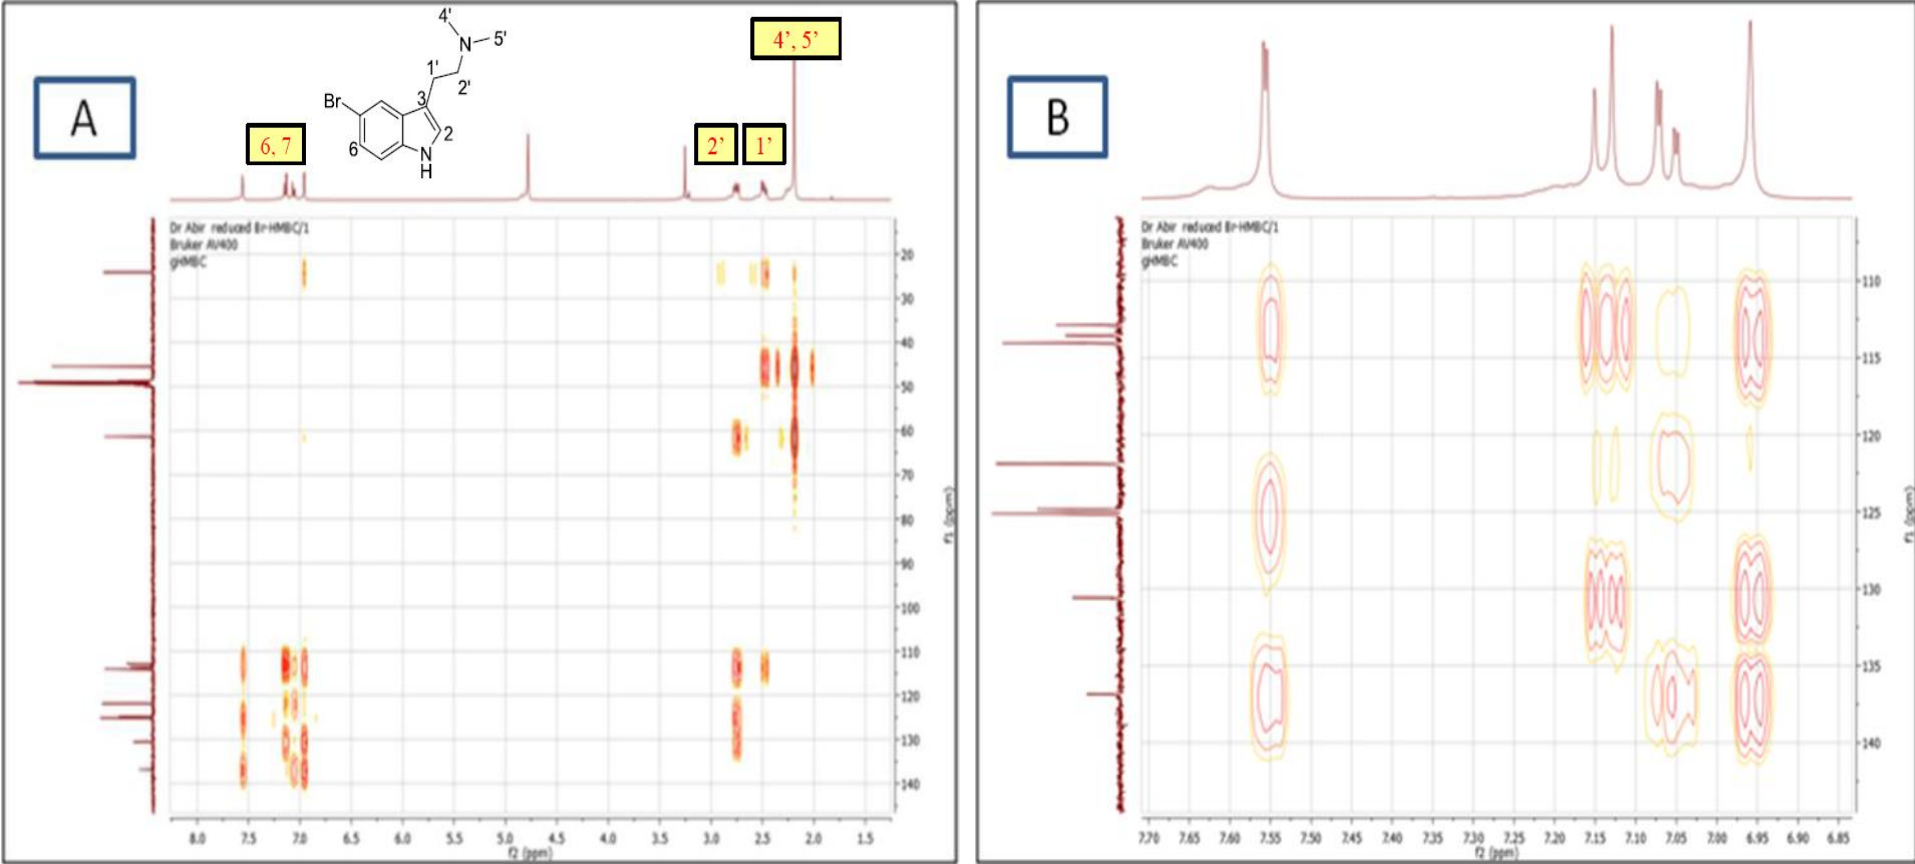

**Figure 30.** HMBC spectrum of 2-(5-bromo-1H-indol-3-yl)-N,N-dimethylethanamine (**2d**) in methanol-d<sub>4</sub> (400 MHz); A) the full spectrum, B) the high field region

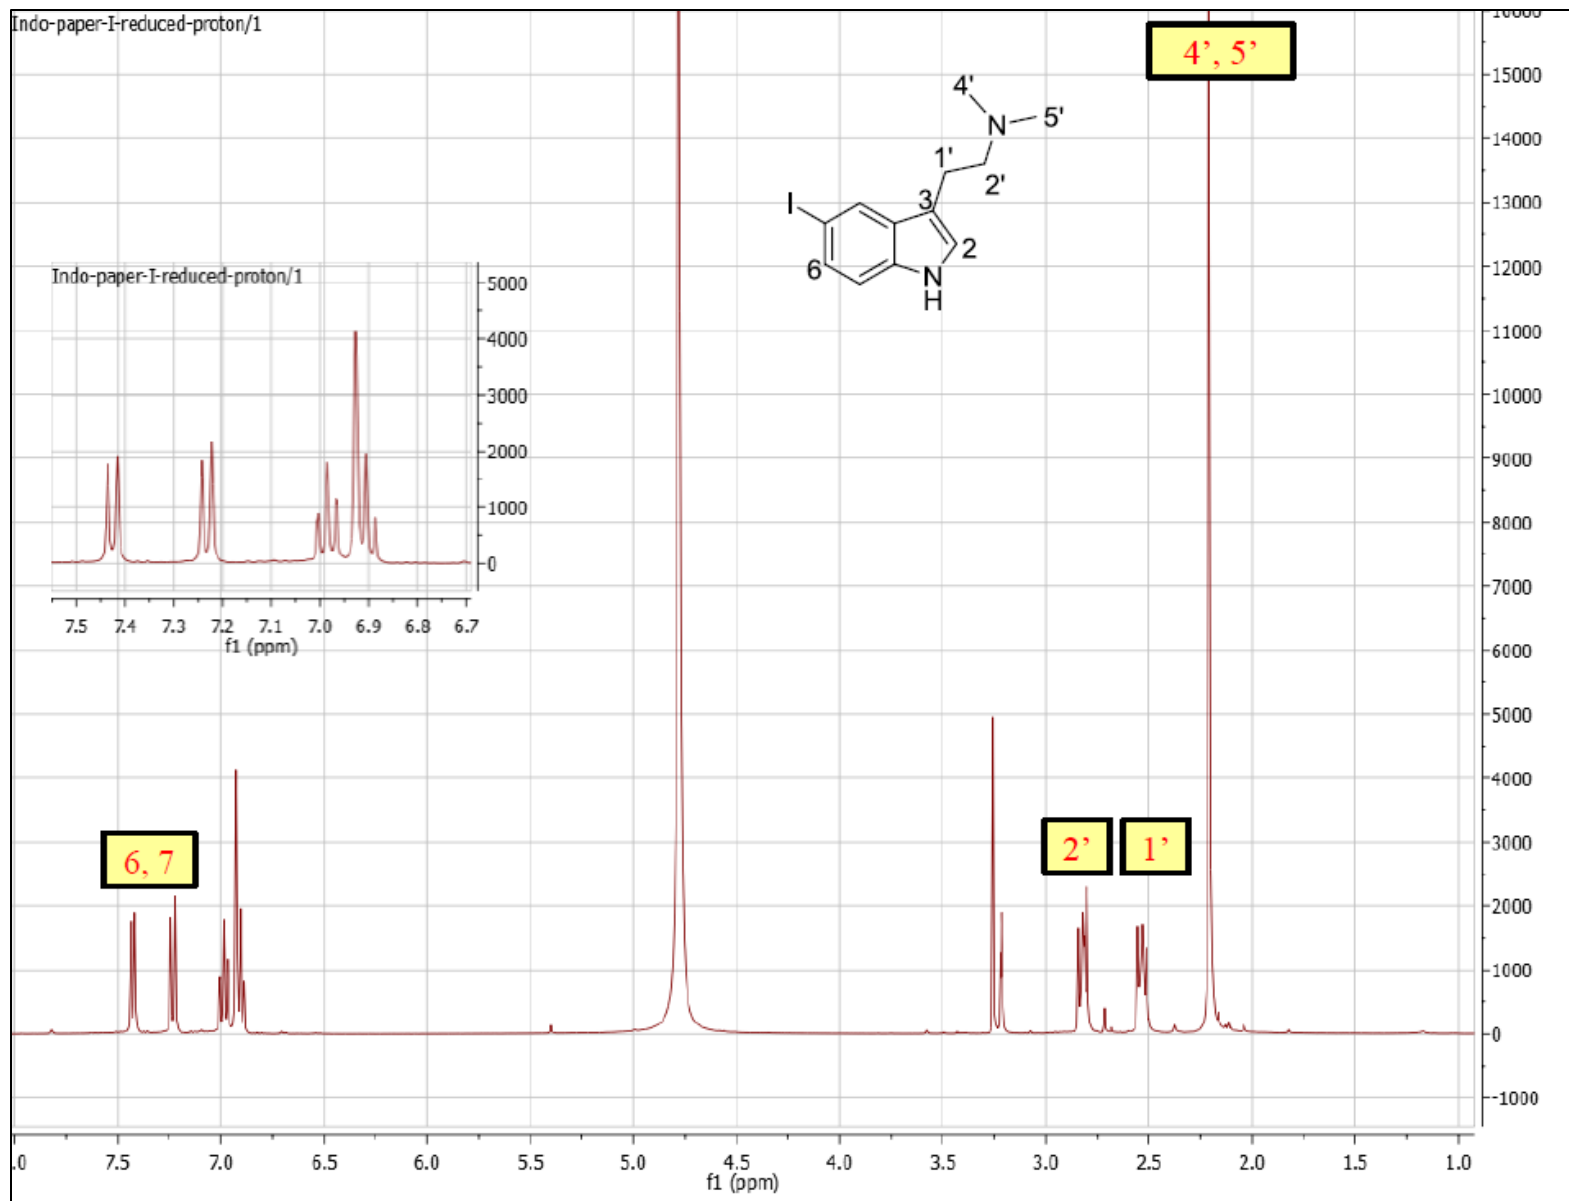

**Figure 31.**  $^1\text{H}$  NMR spectrum of 2-(5-iodo-1H-indol-3-yl)-N,N-dimethylethanamine (**2e**) in methanol- $d_4$  (400 MHz)



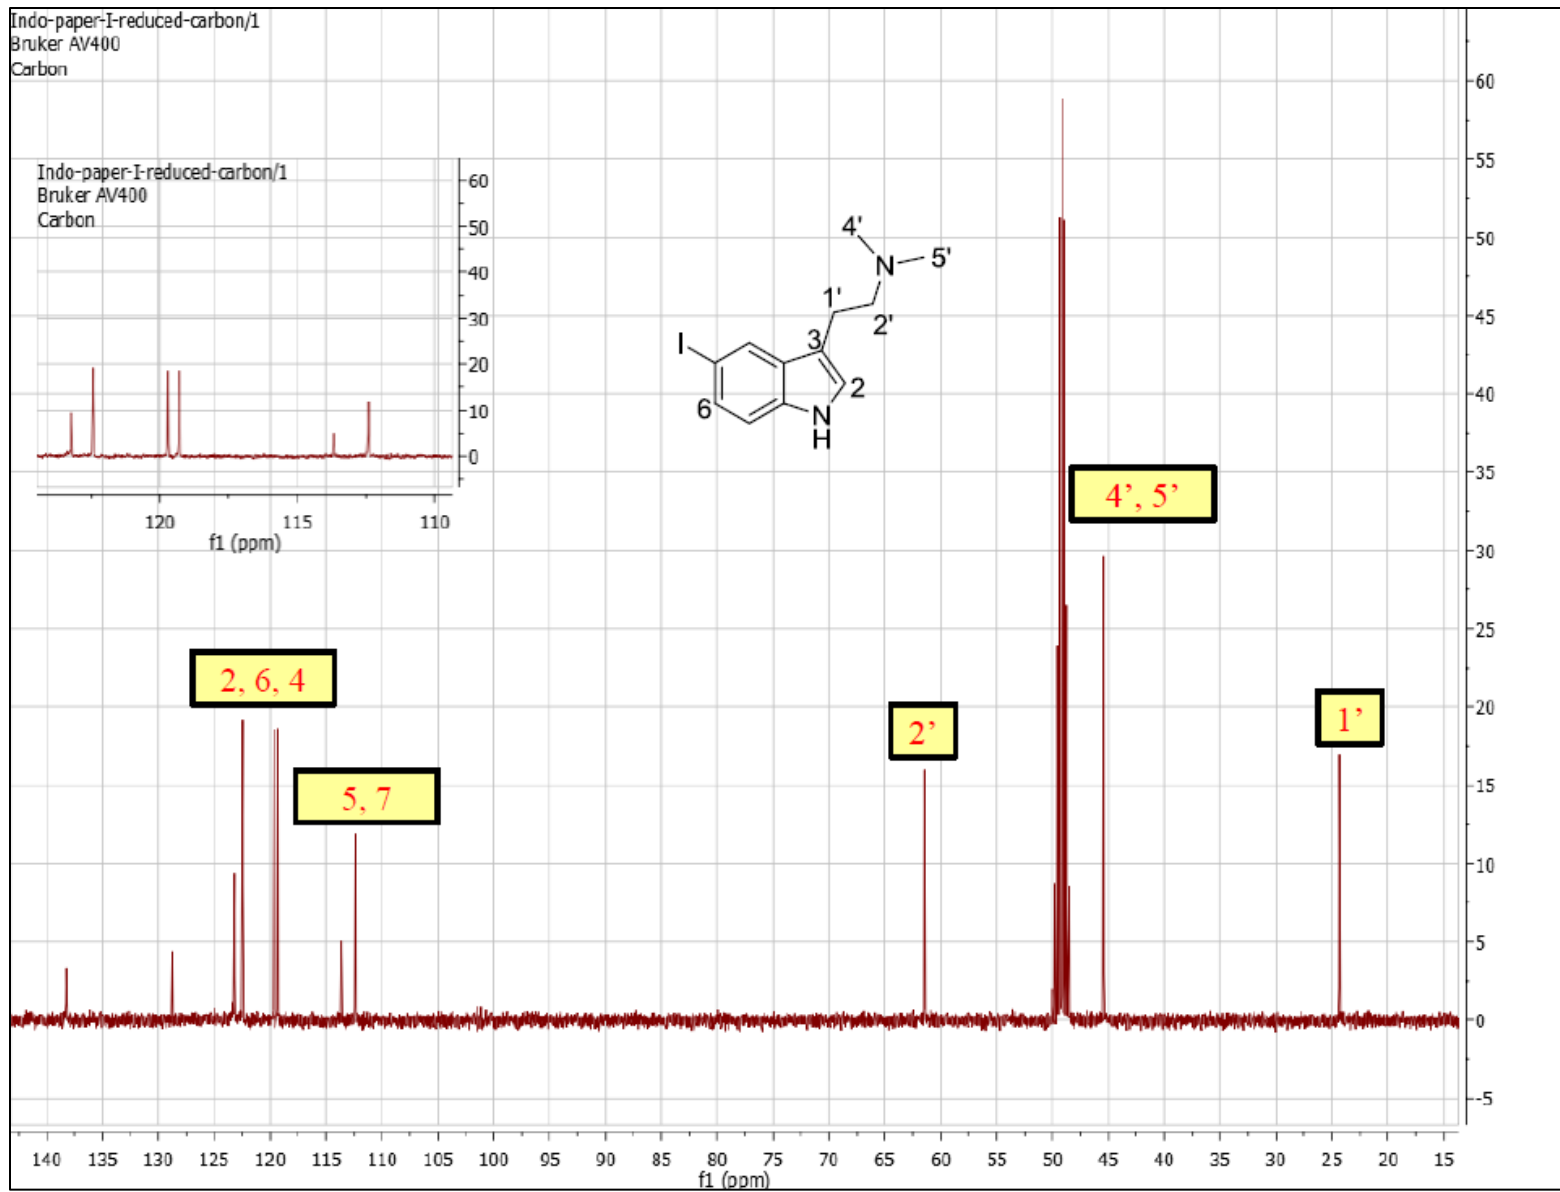

**Figure 32.**  $^{13}\text{C}$  NMR spectrum of 2-(5-iodo-1*H*-indol-3-yl)-*N,N*-dimethylethanamine (**2e**) in methanol- $d_4$  (400 MHz)

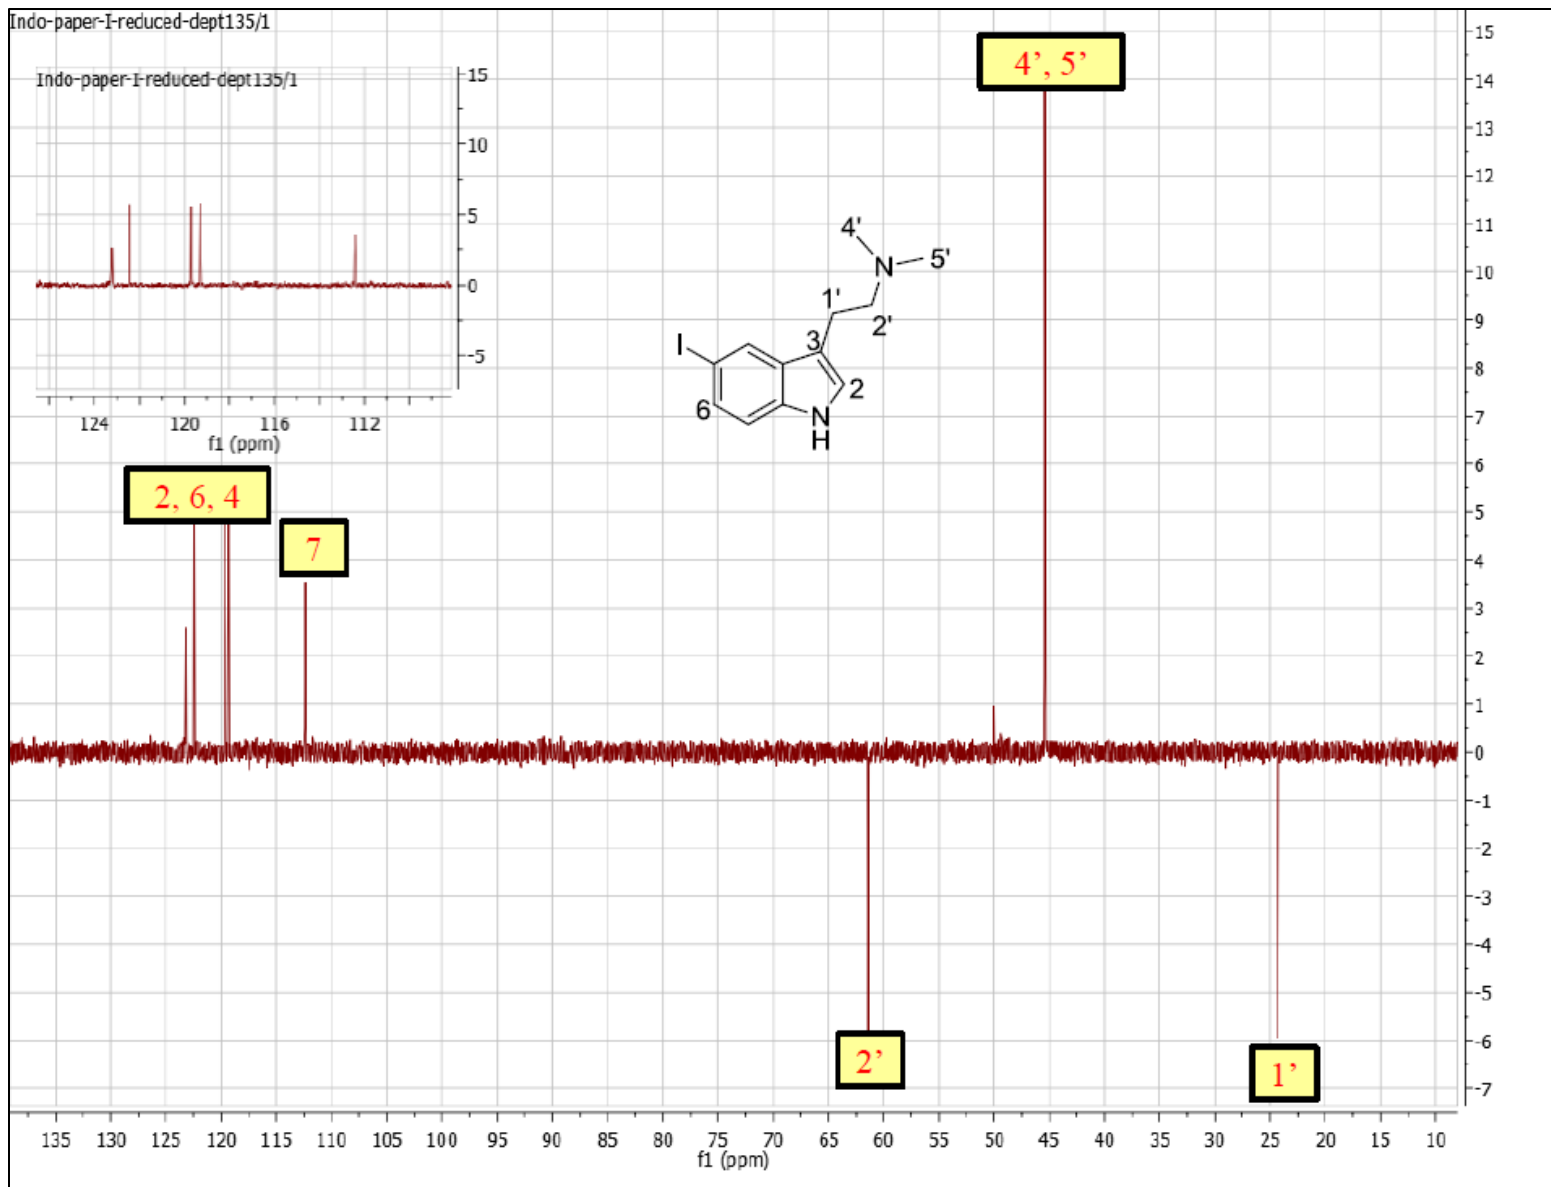

**Figure 33.**  $^{135}\text{O}$  DEPT spectrum of 2-(5-iodo-1*H*-indol-3-yl)-*N,N*-dimethylethanamine (**2e**) in methanol- $d_4$  (400 MHz)
